# Supplementary material for: Hsp90 induces Acsl4-dependent glioma ferroptosis via dephosphorylating Ser637 at Drp1
Source: PubMed Central journal article supplement (PMC9192632; doi:10.1038/s41419-022-04997-1), 2022-06-13

Figure.1E

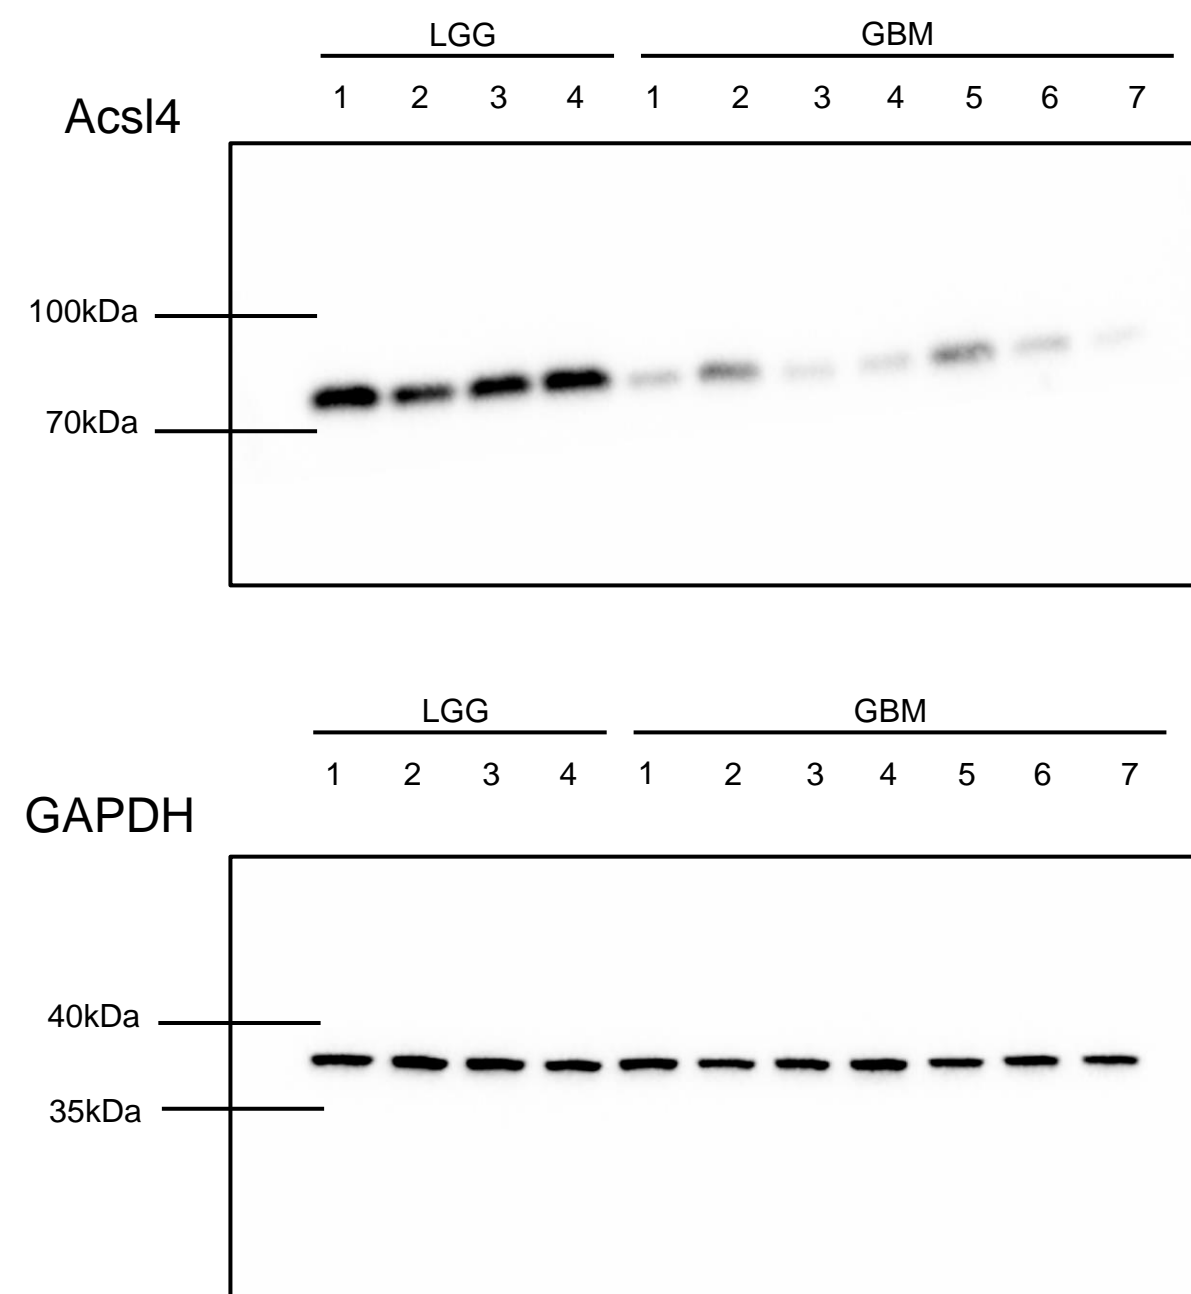

Figure.2D

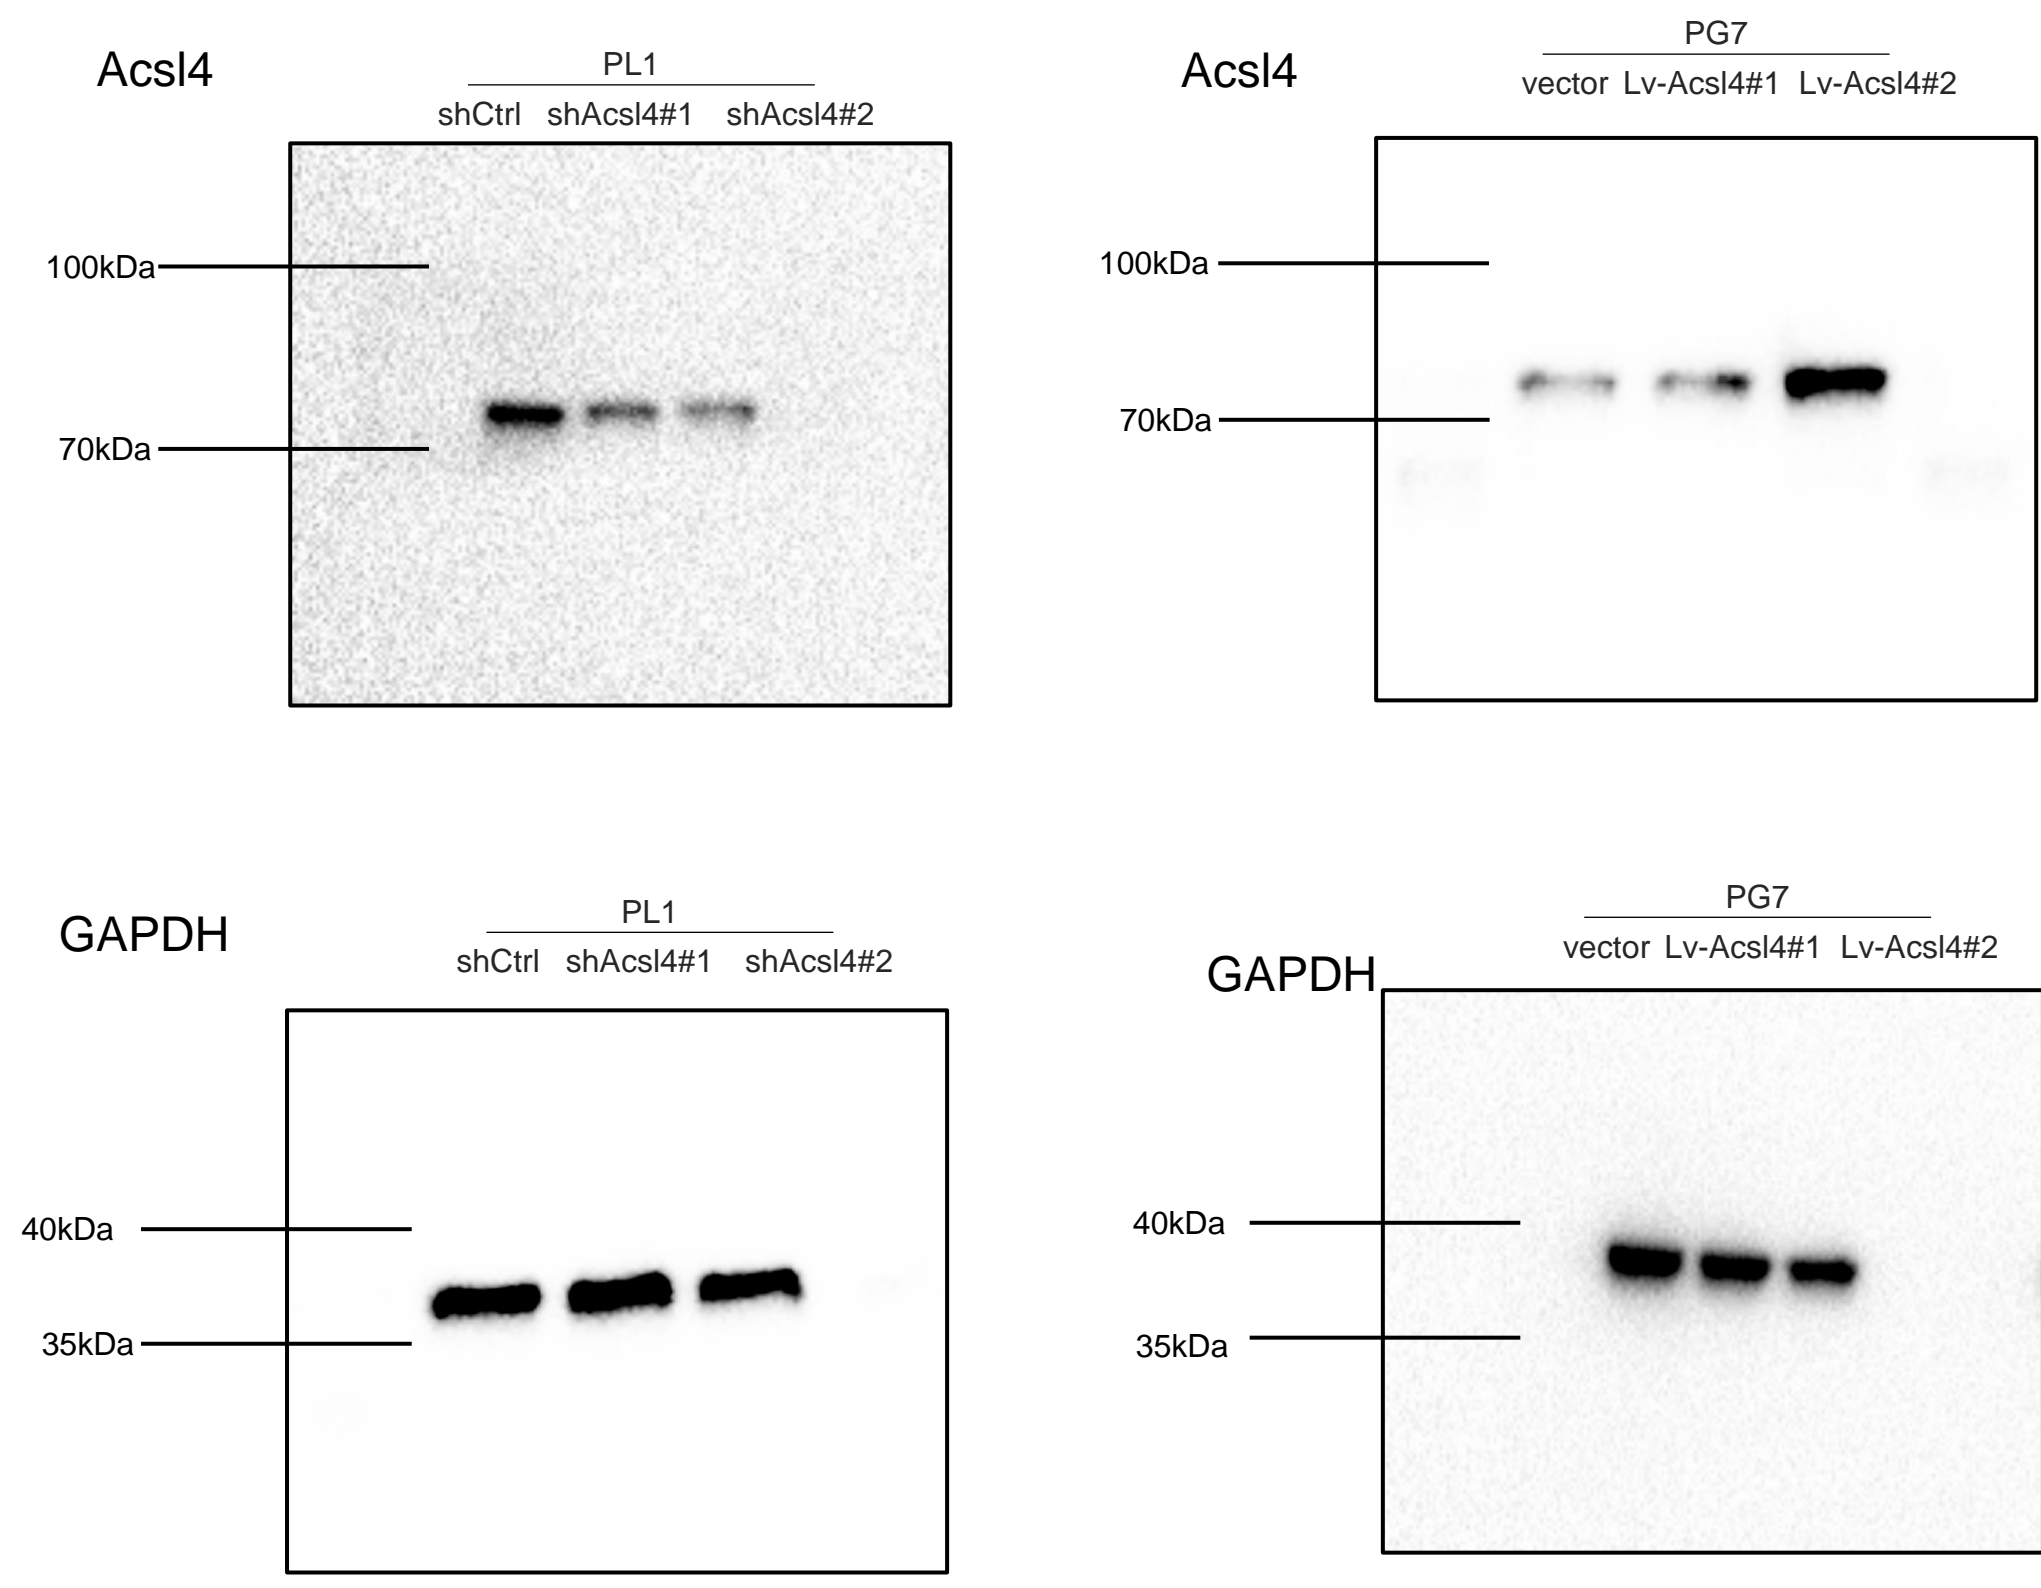

Figure.3D

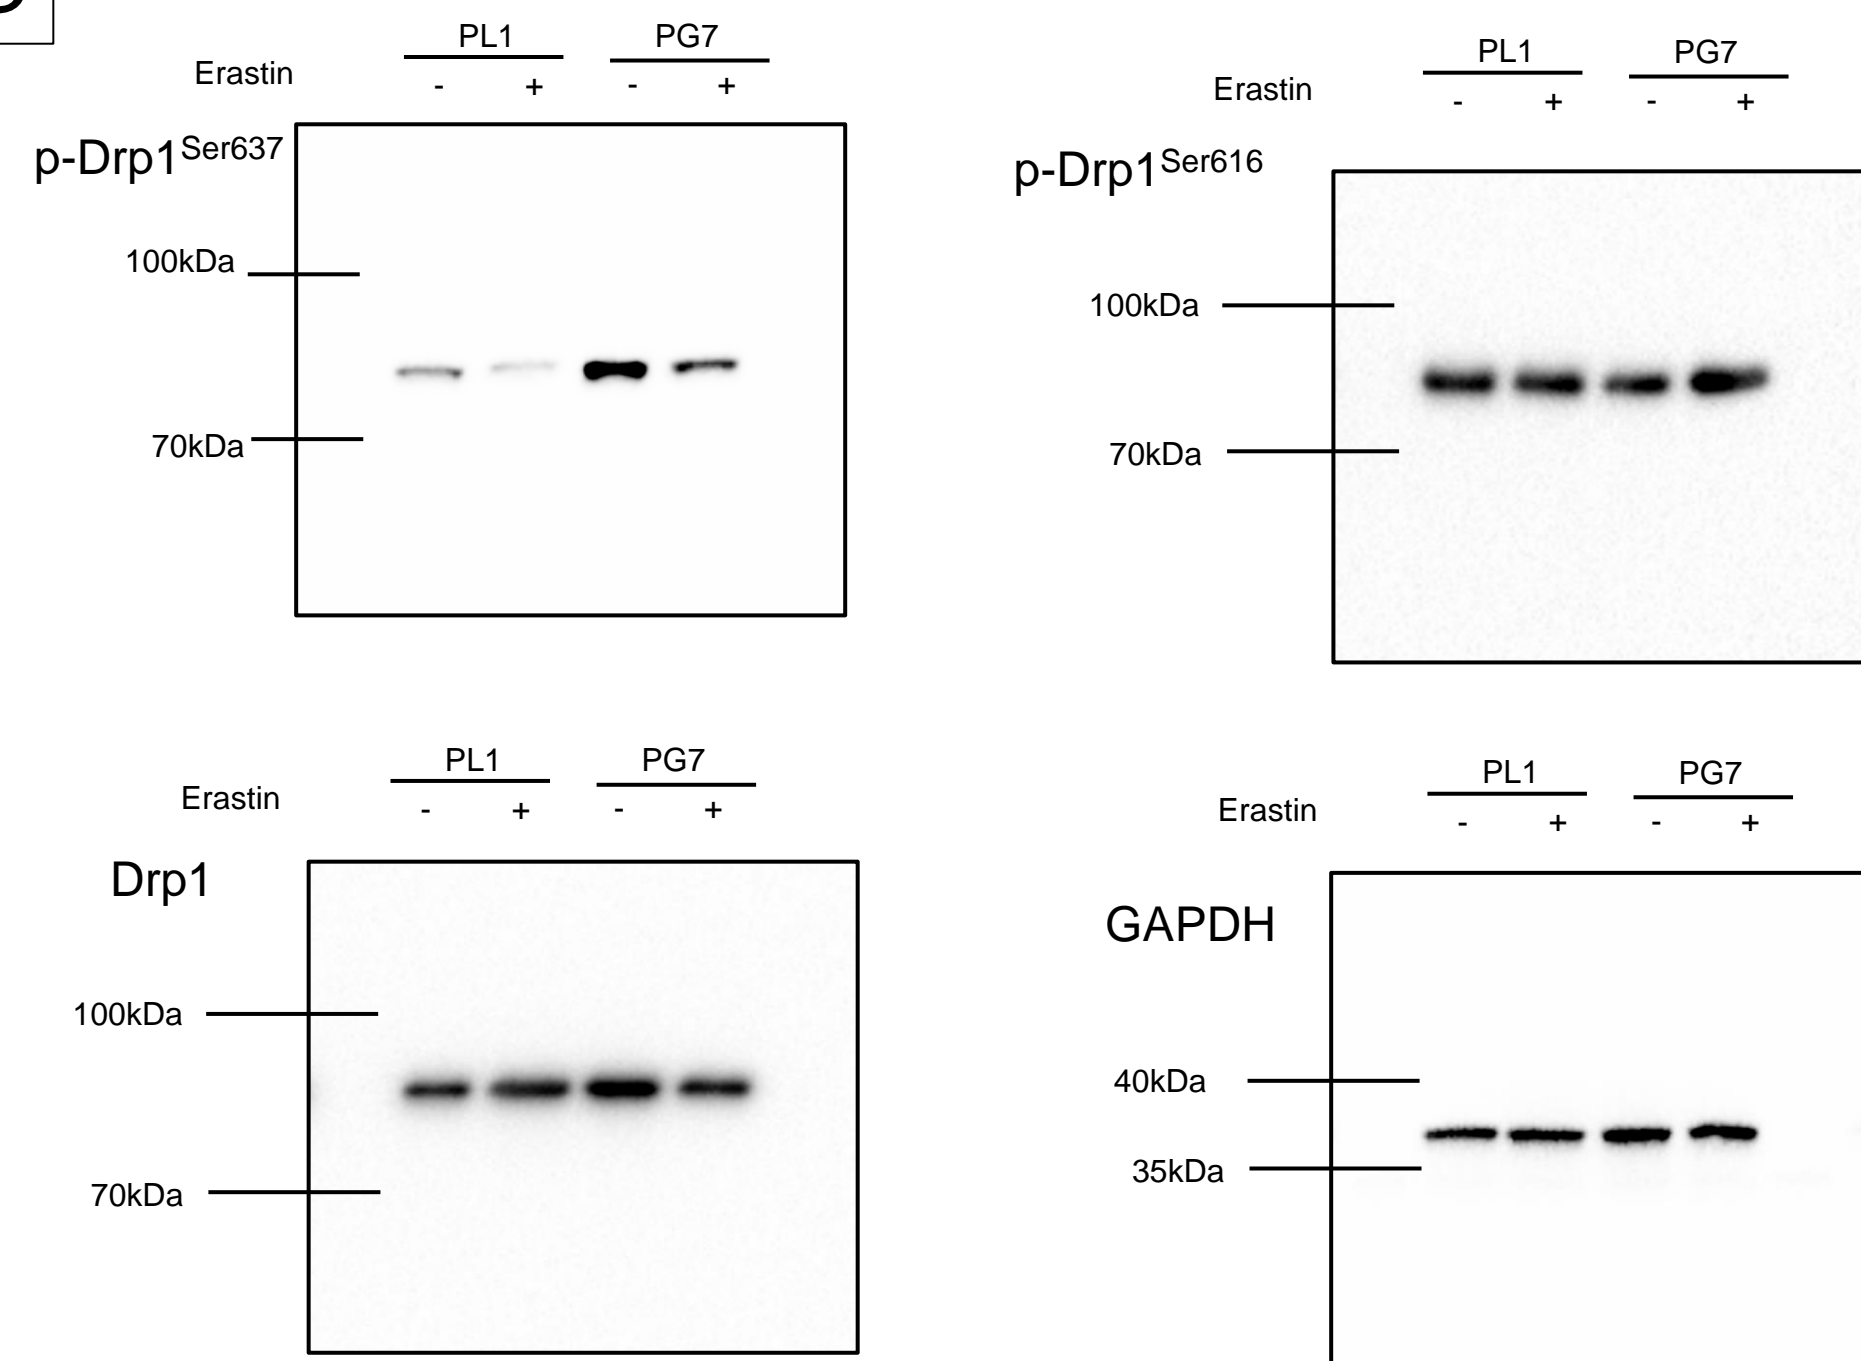

Figure.3B

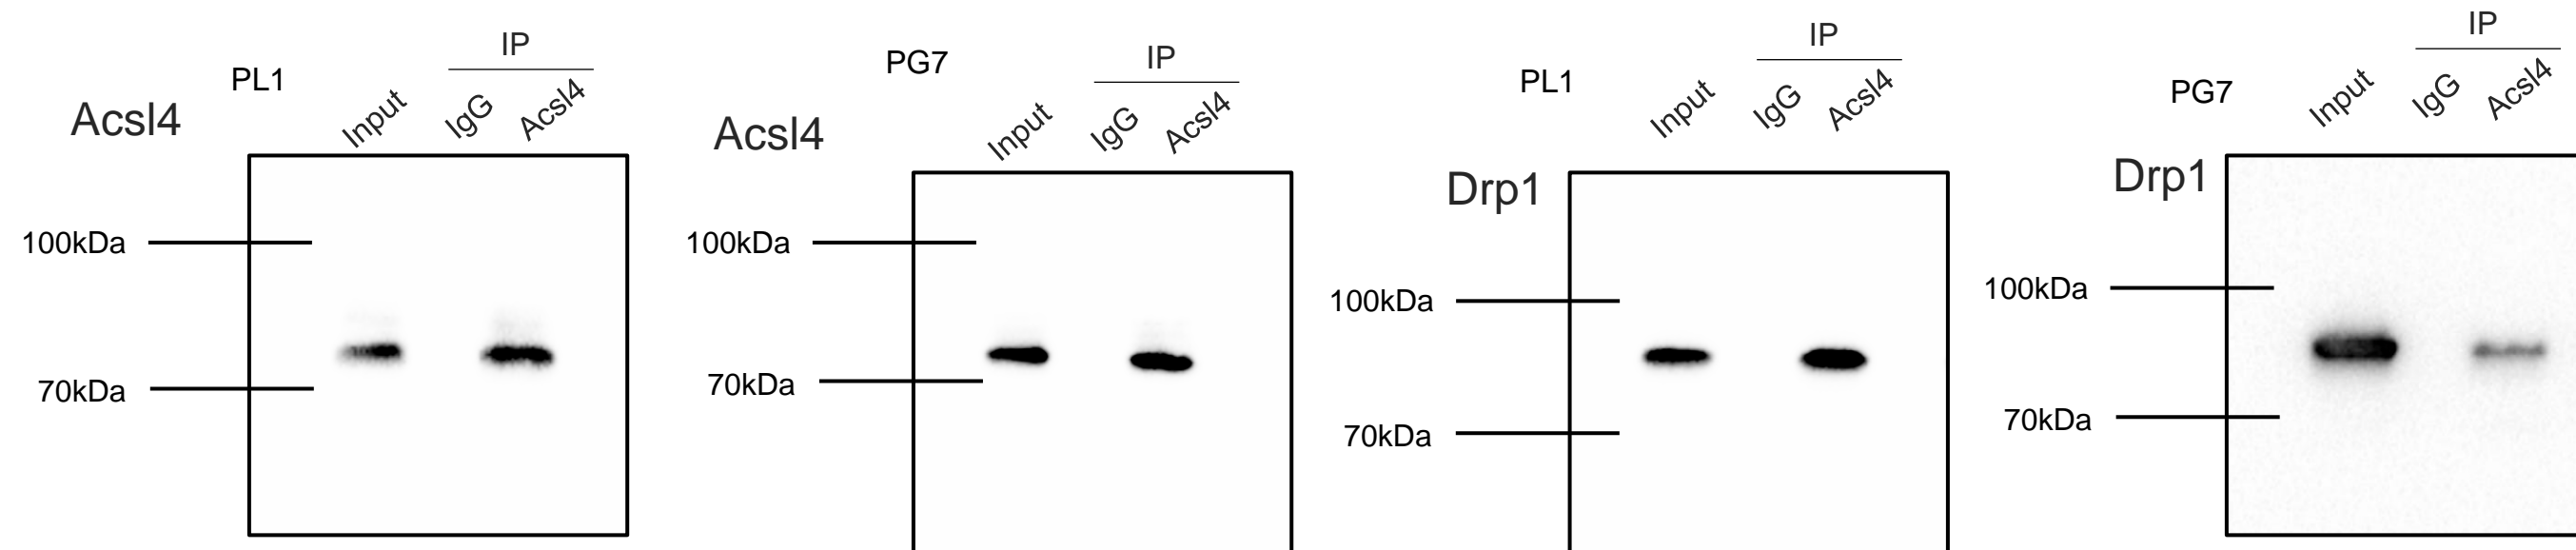

**Figure.4D**

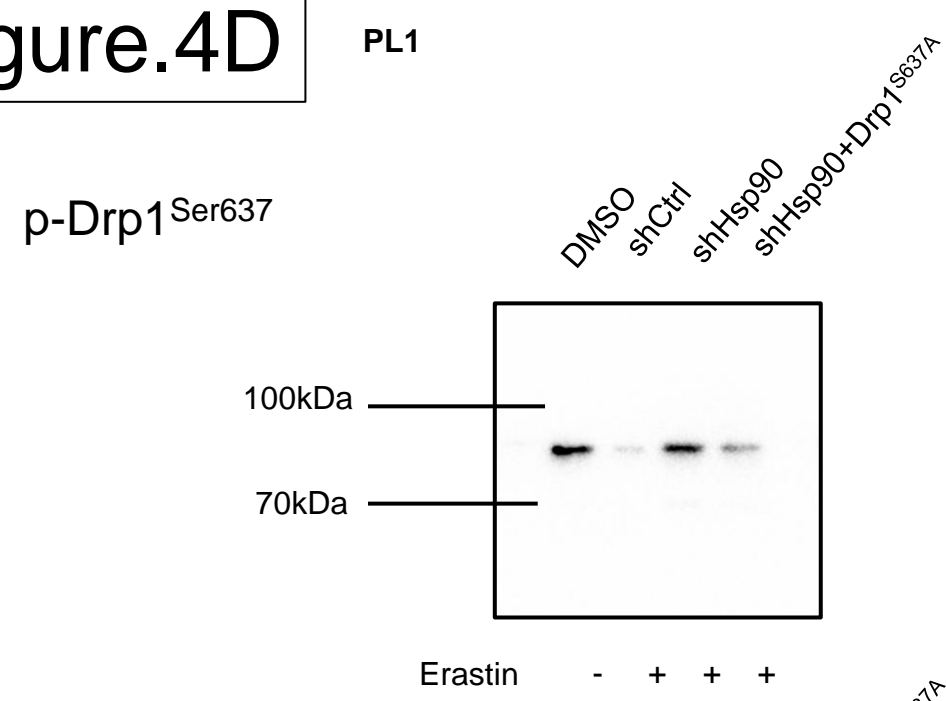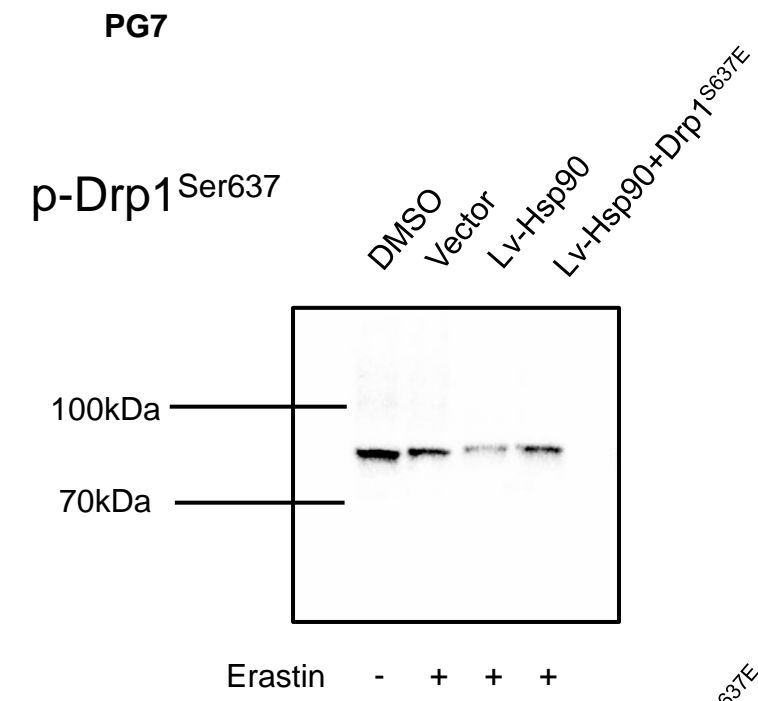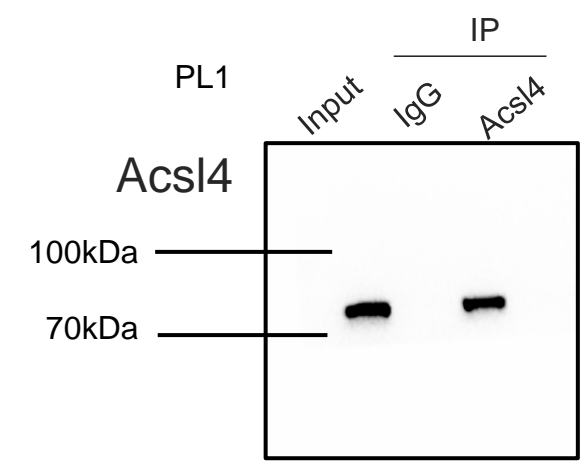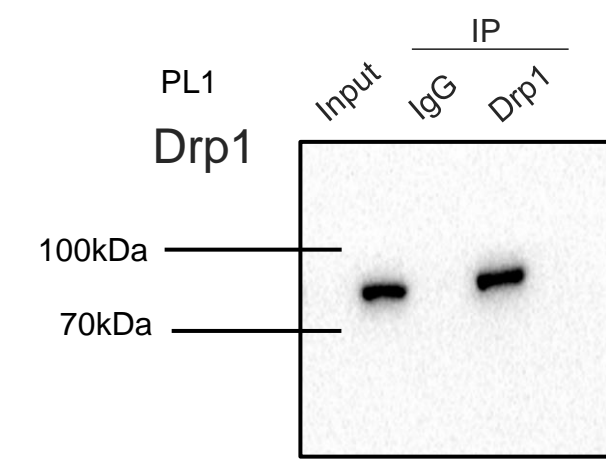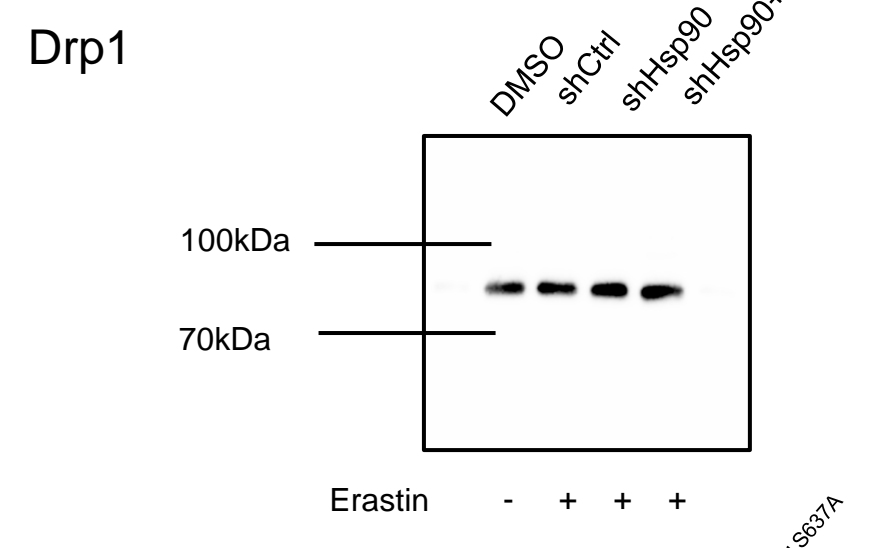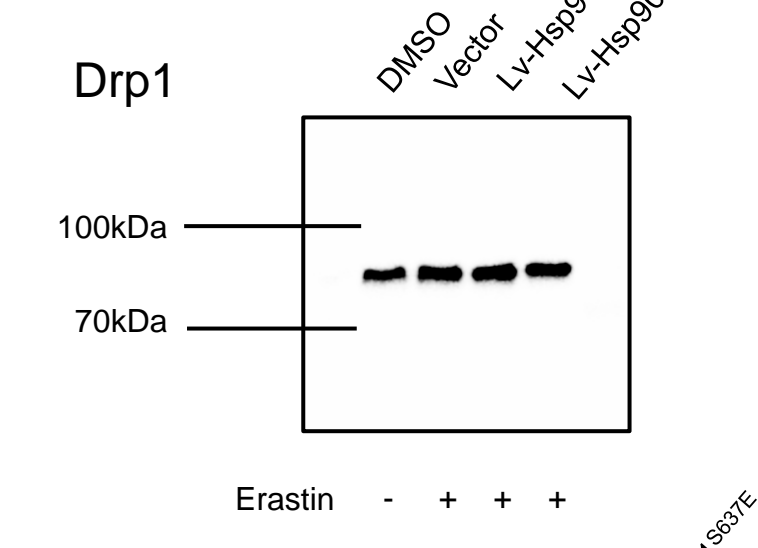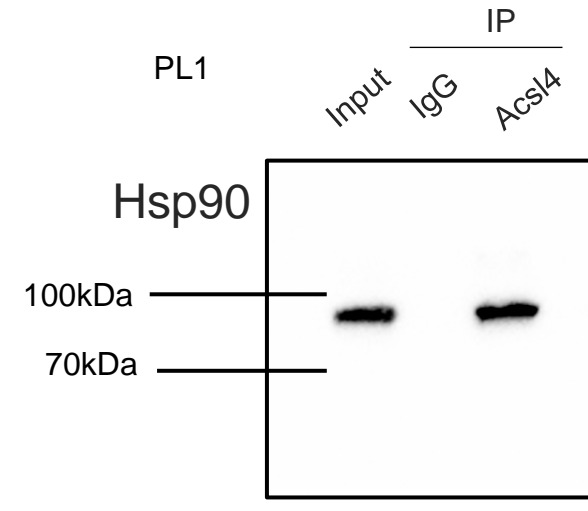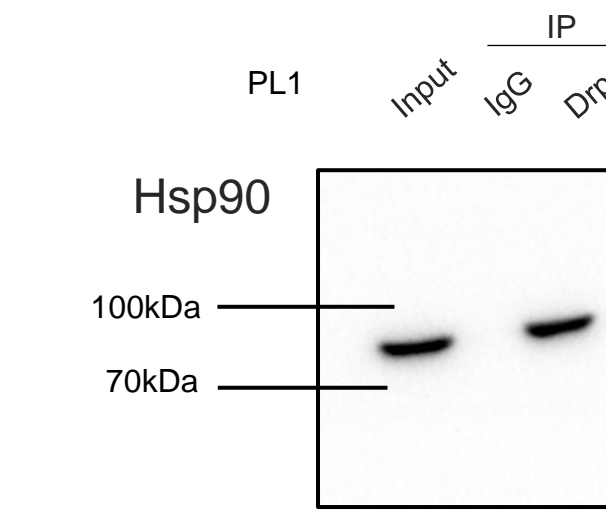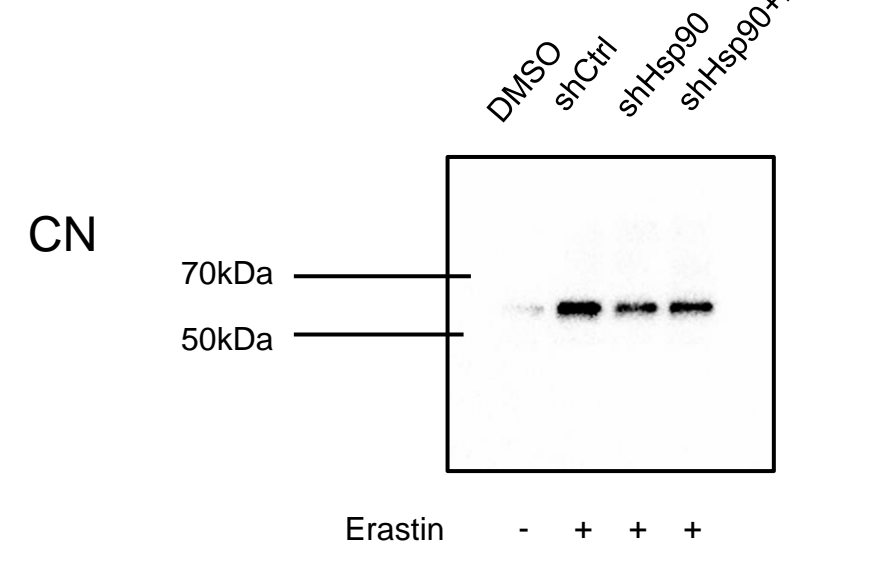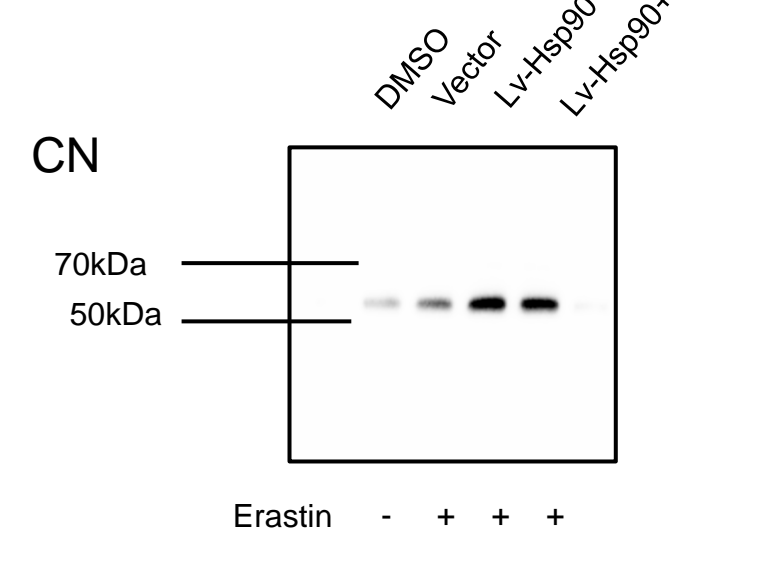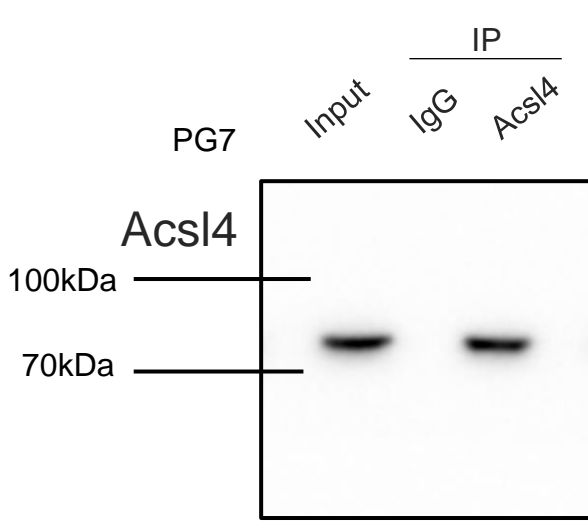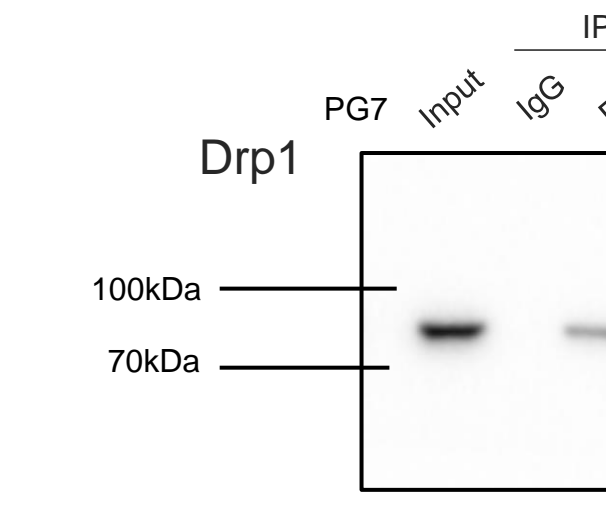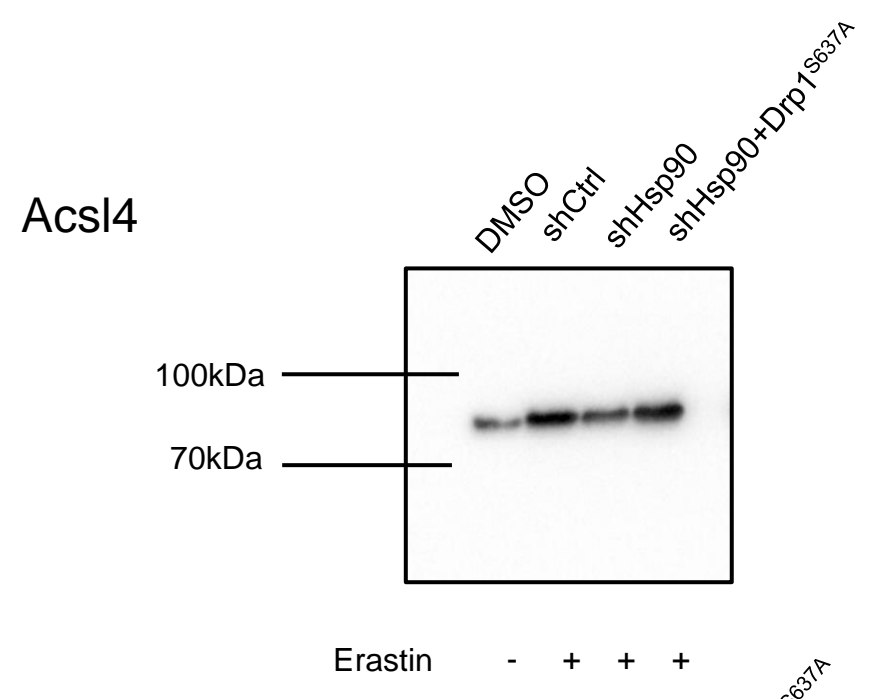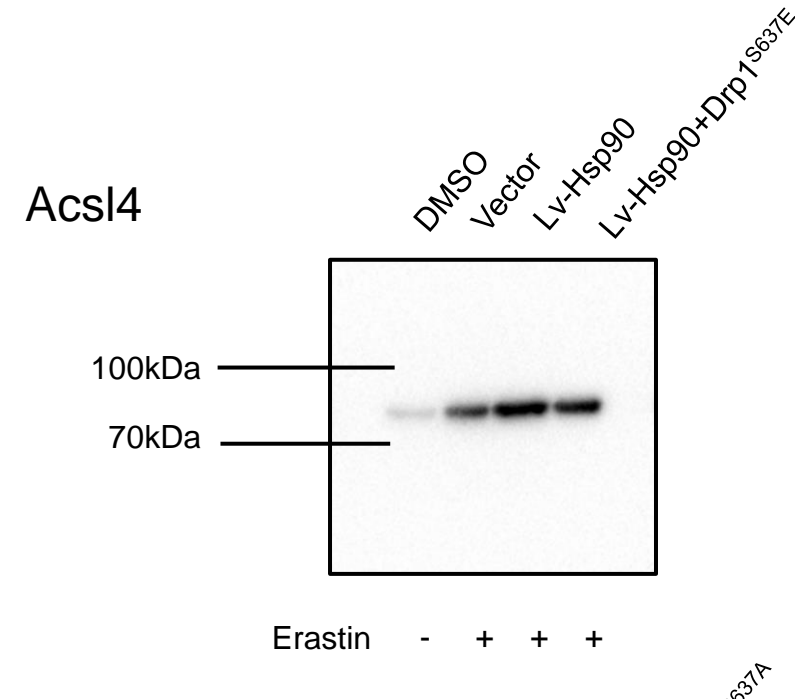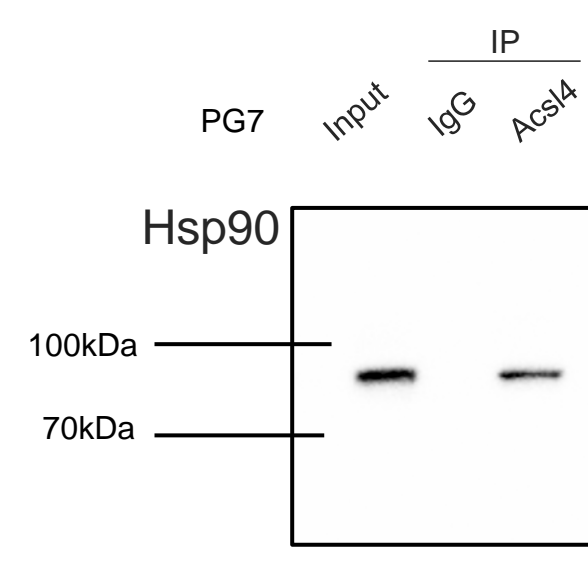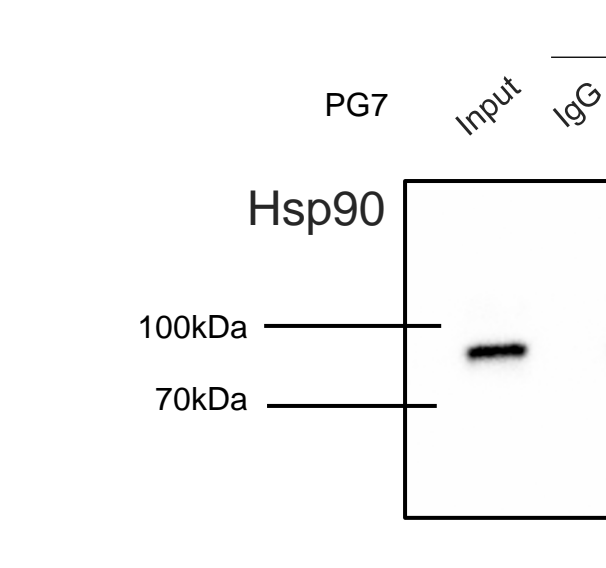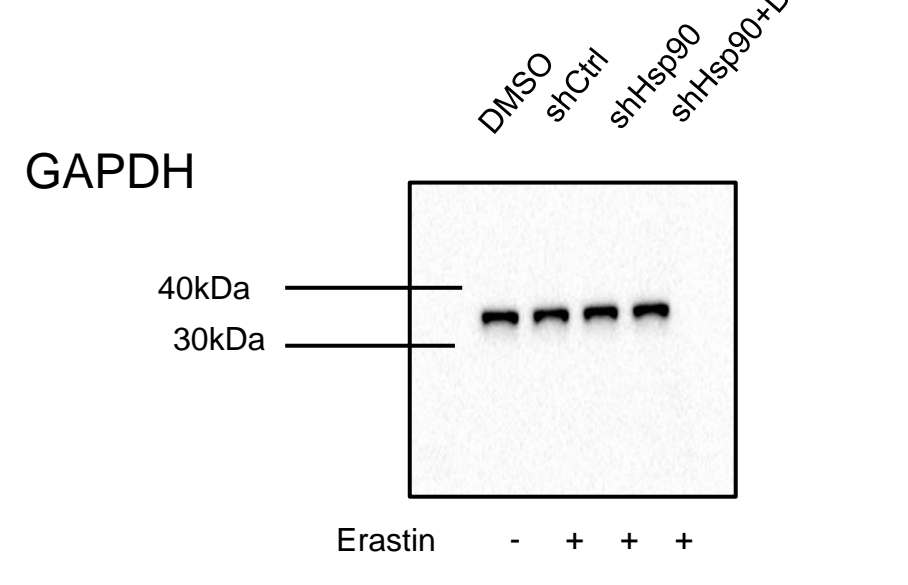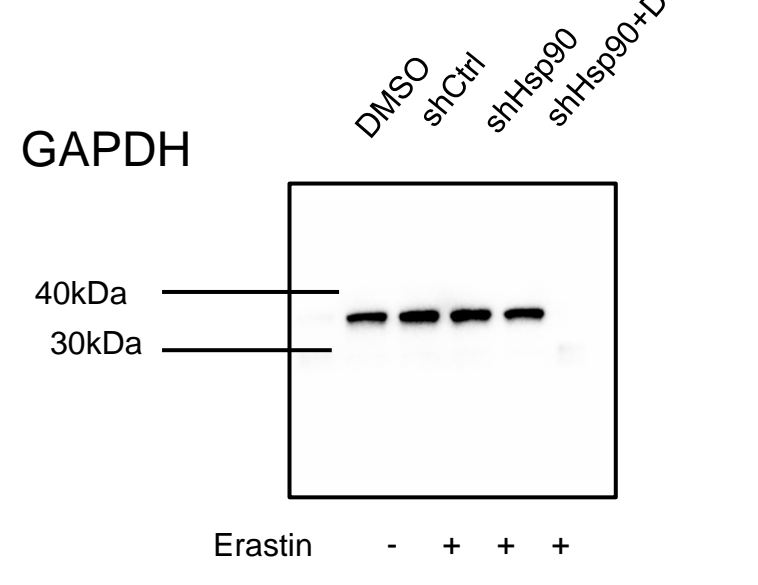

Figure.4E,F

PL1 cells

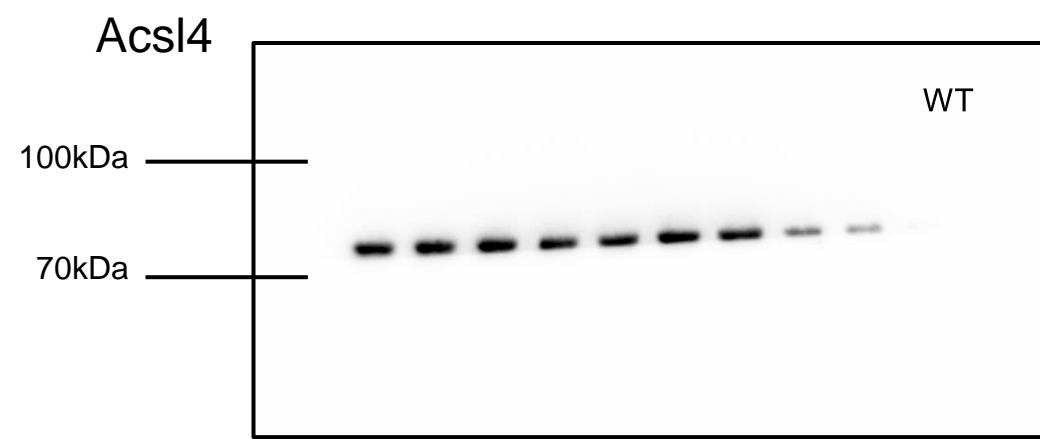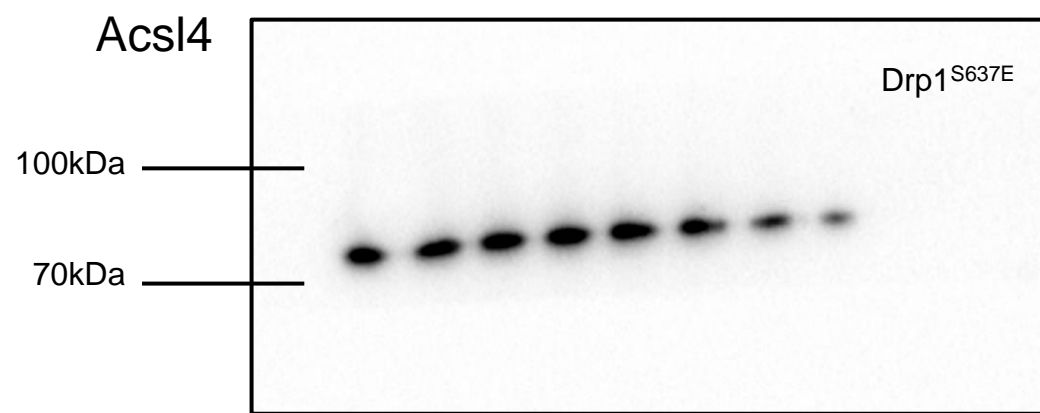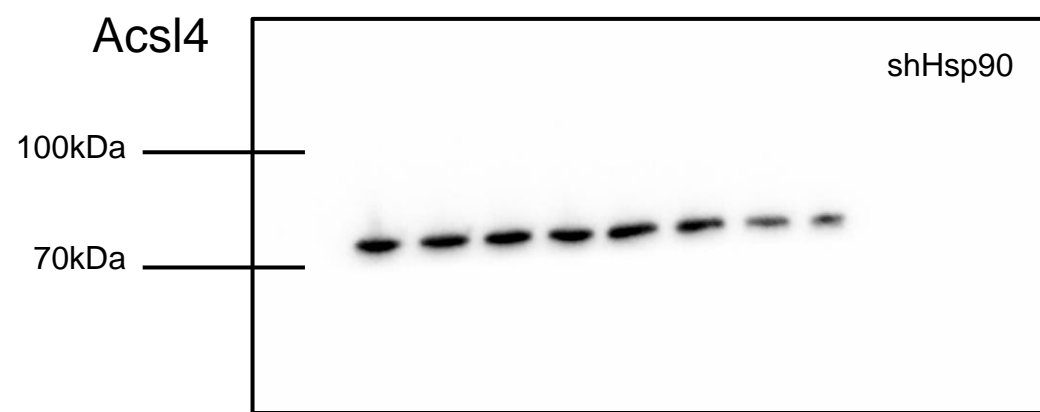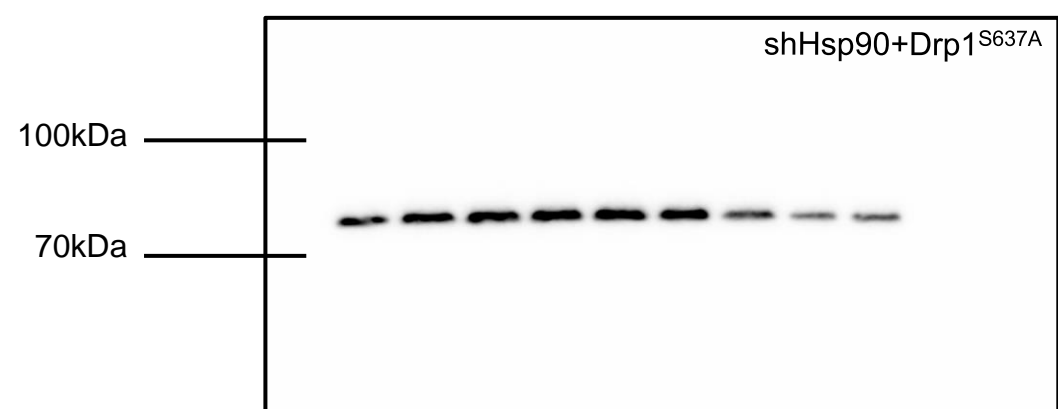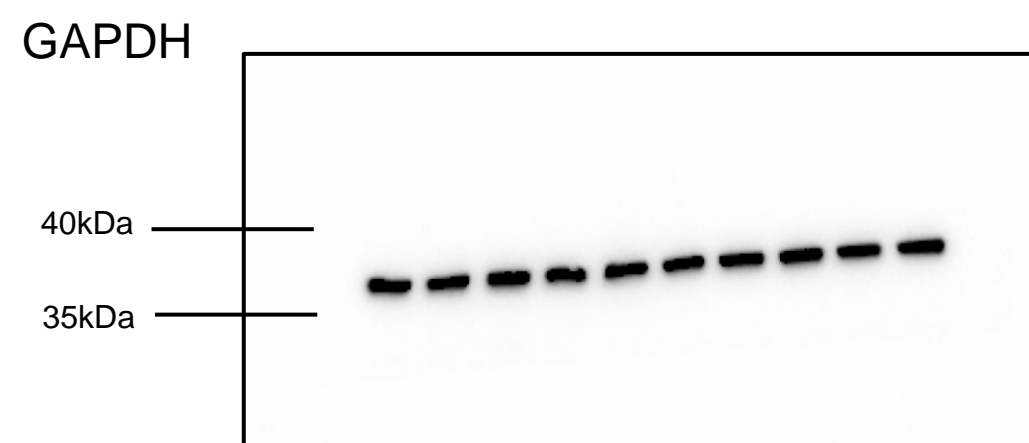

PG7 cells

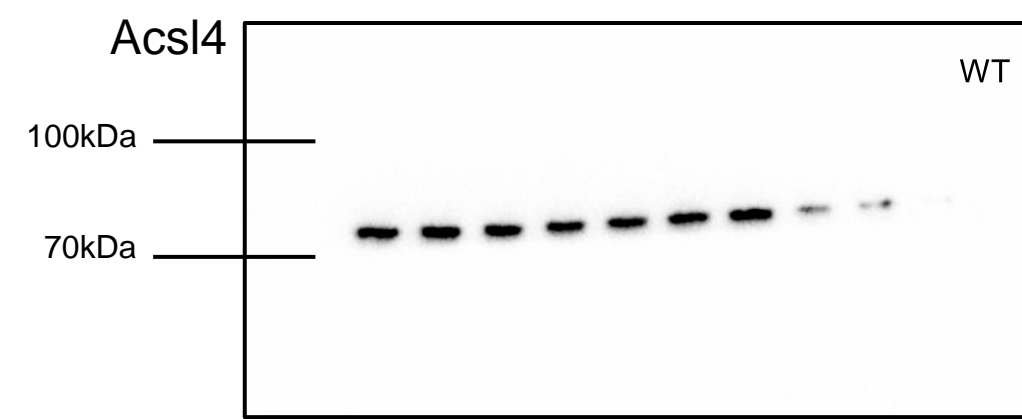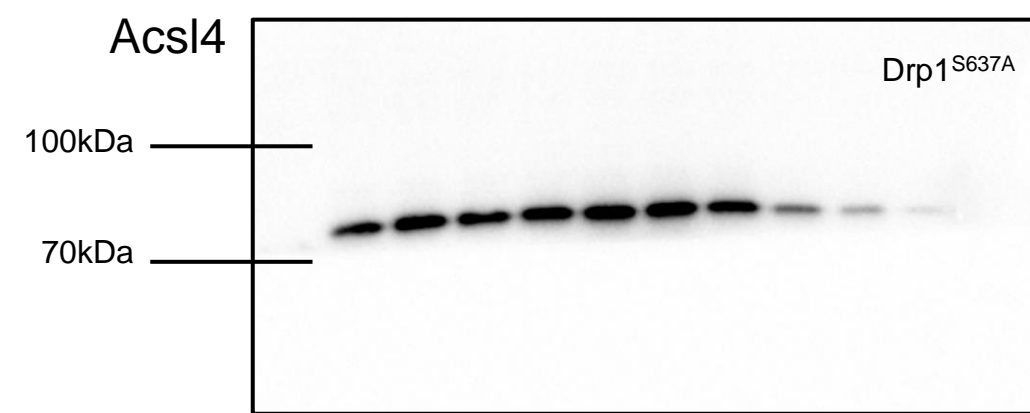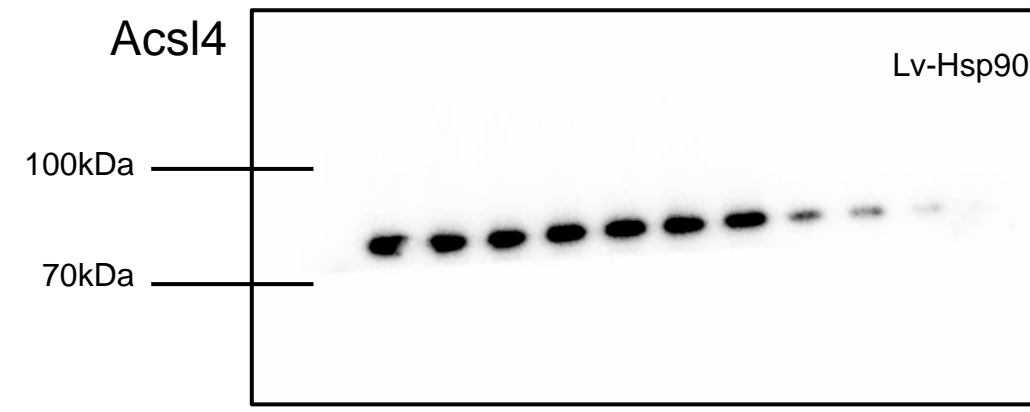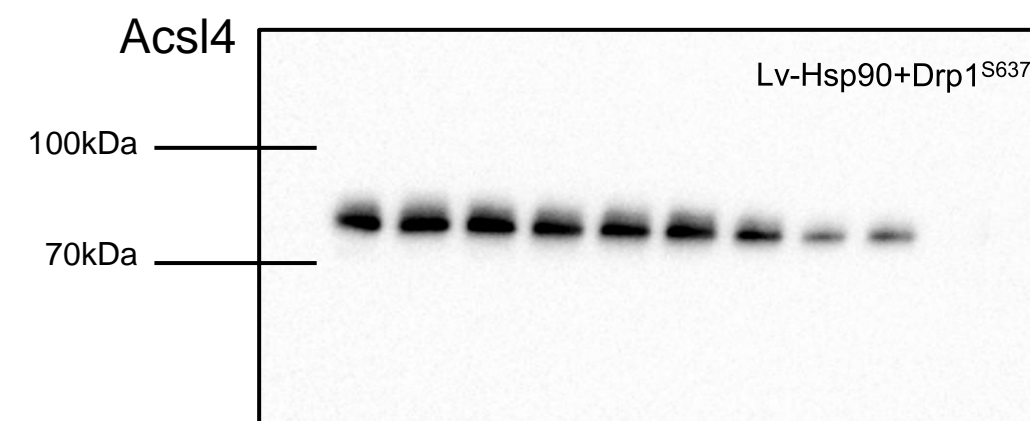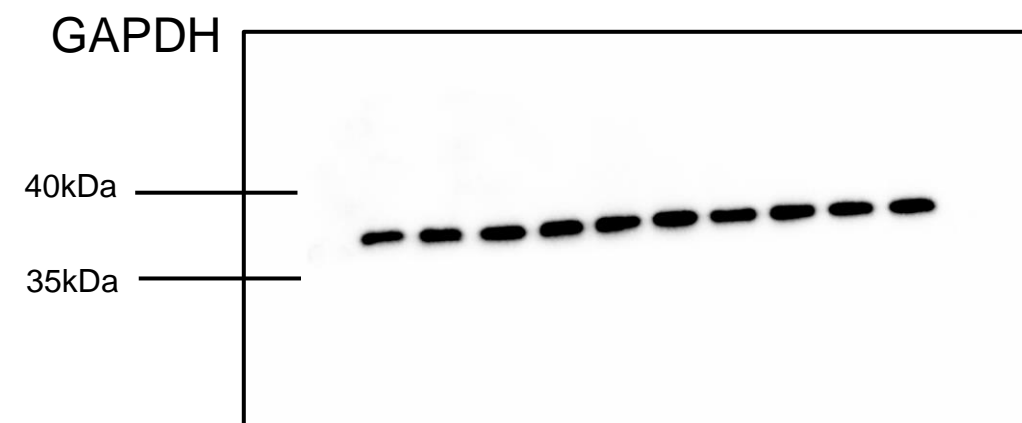

Figure.5A,B

PL1

PG7

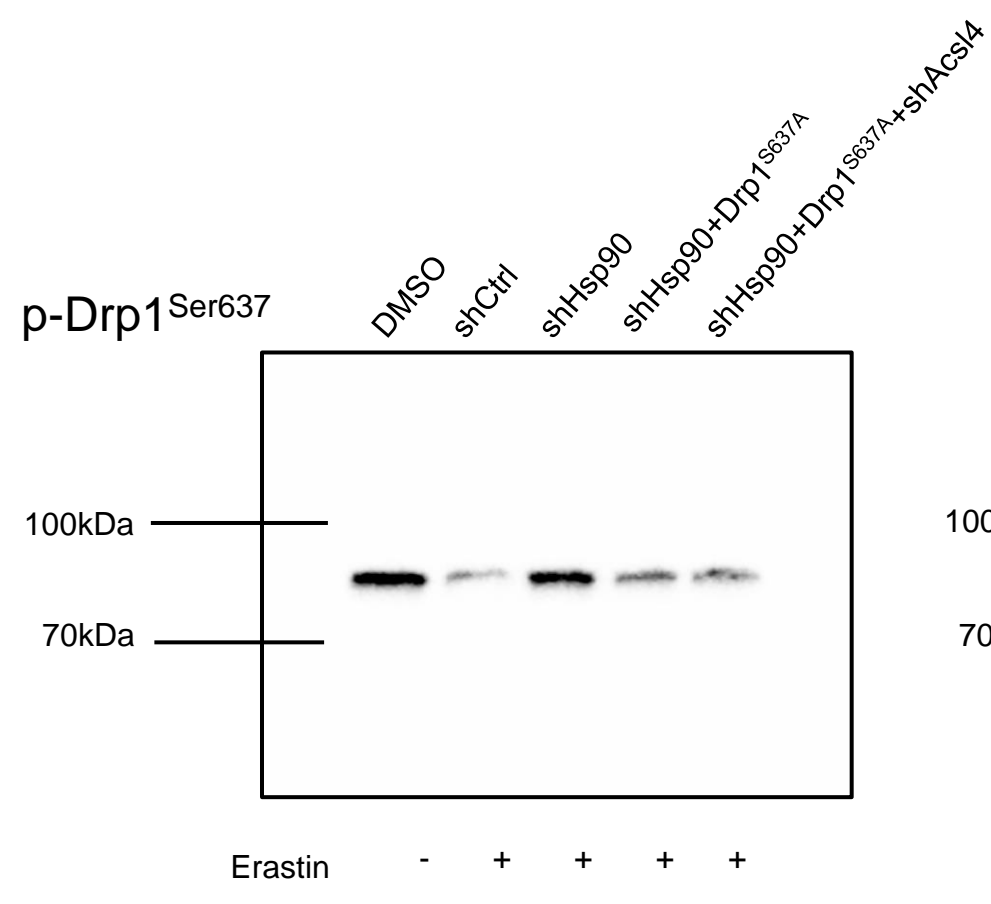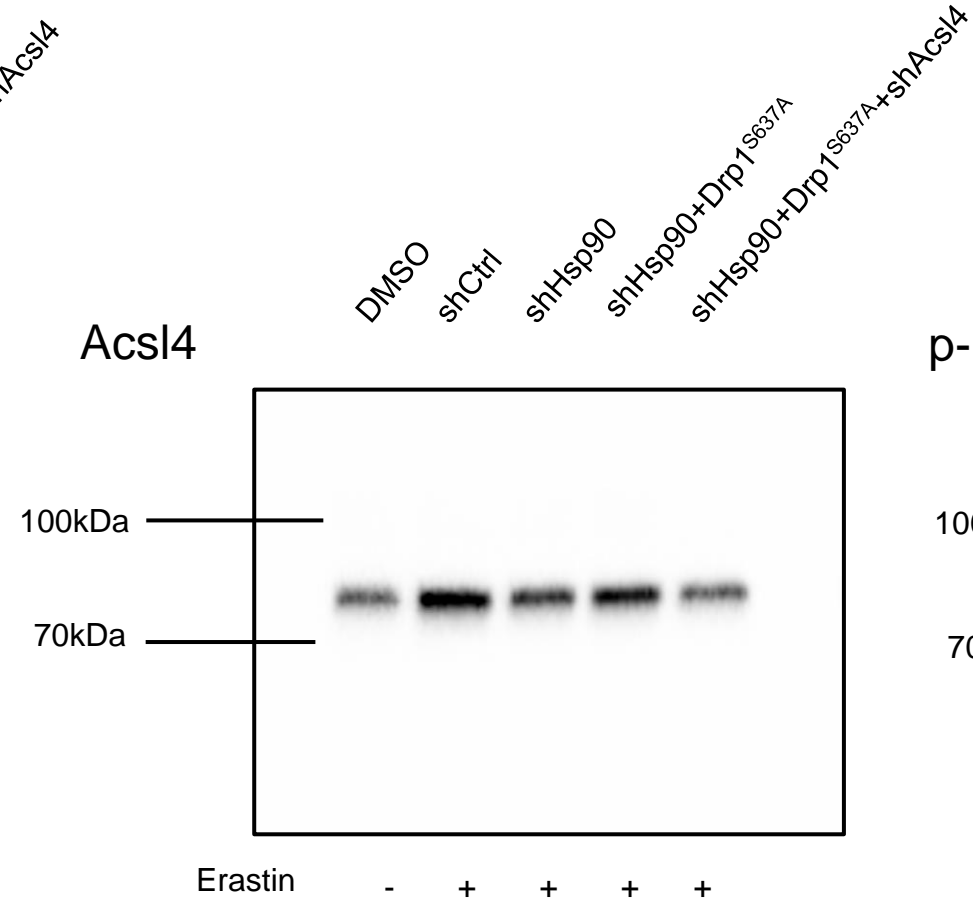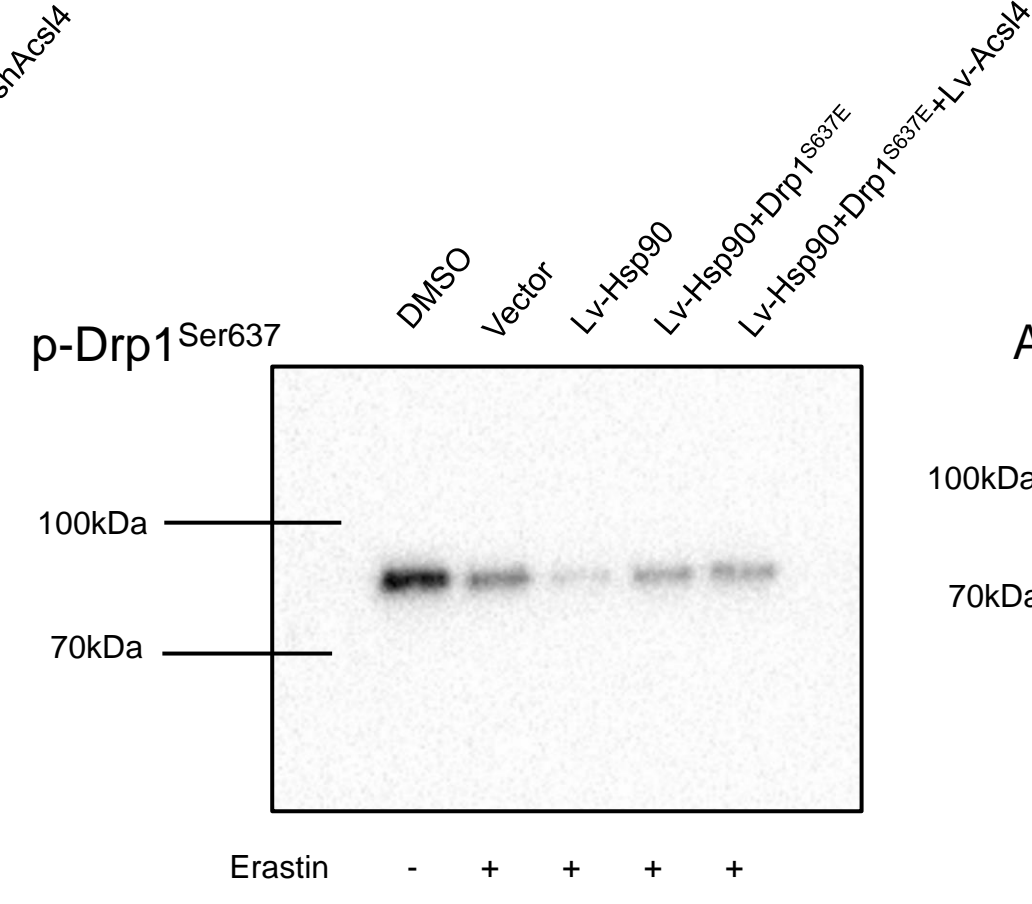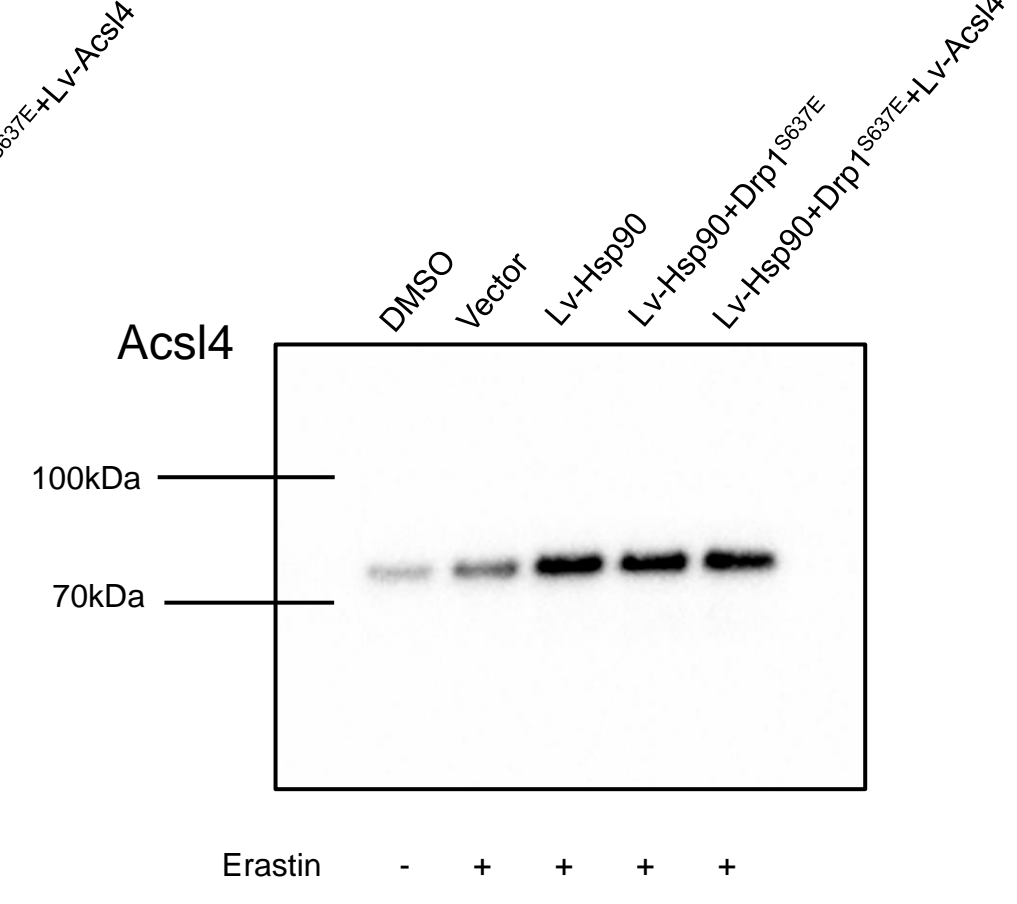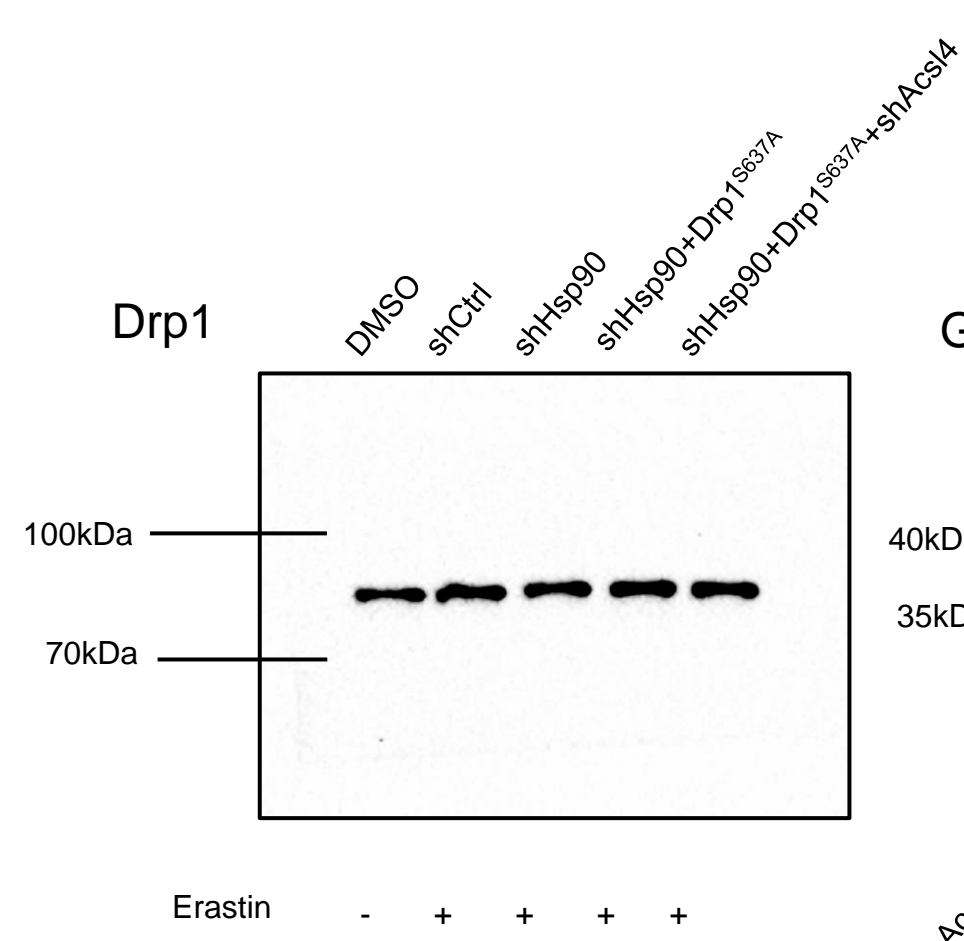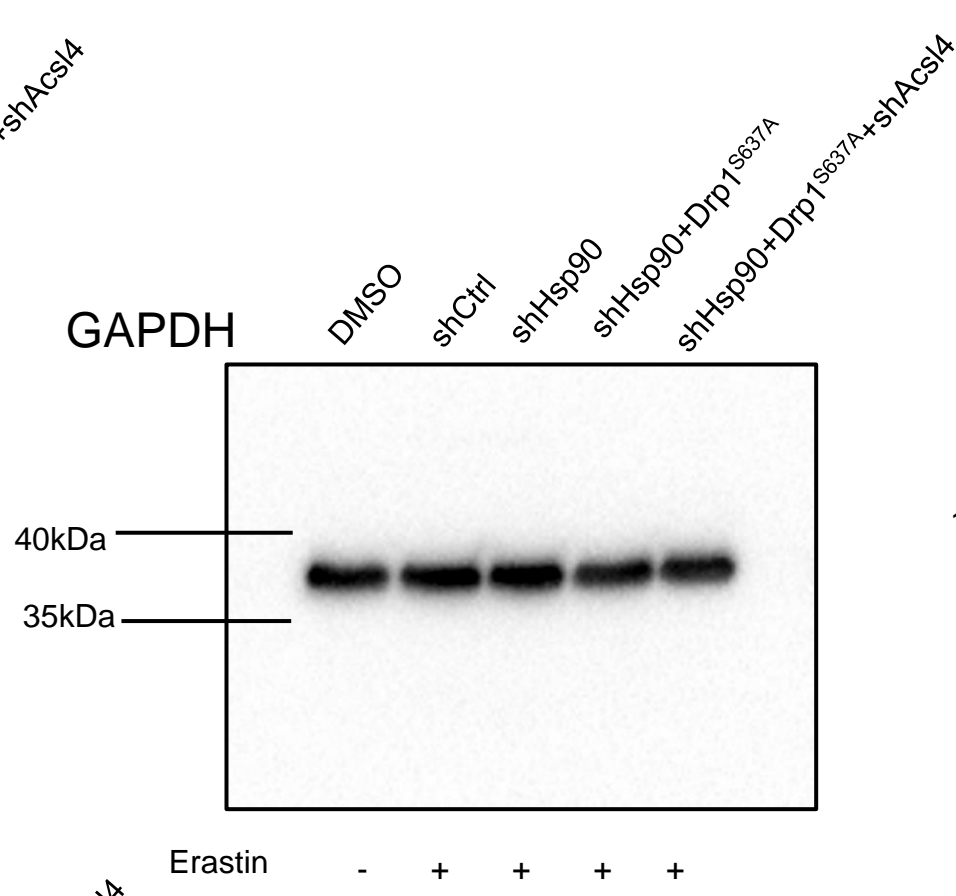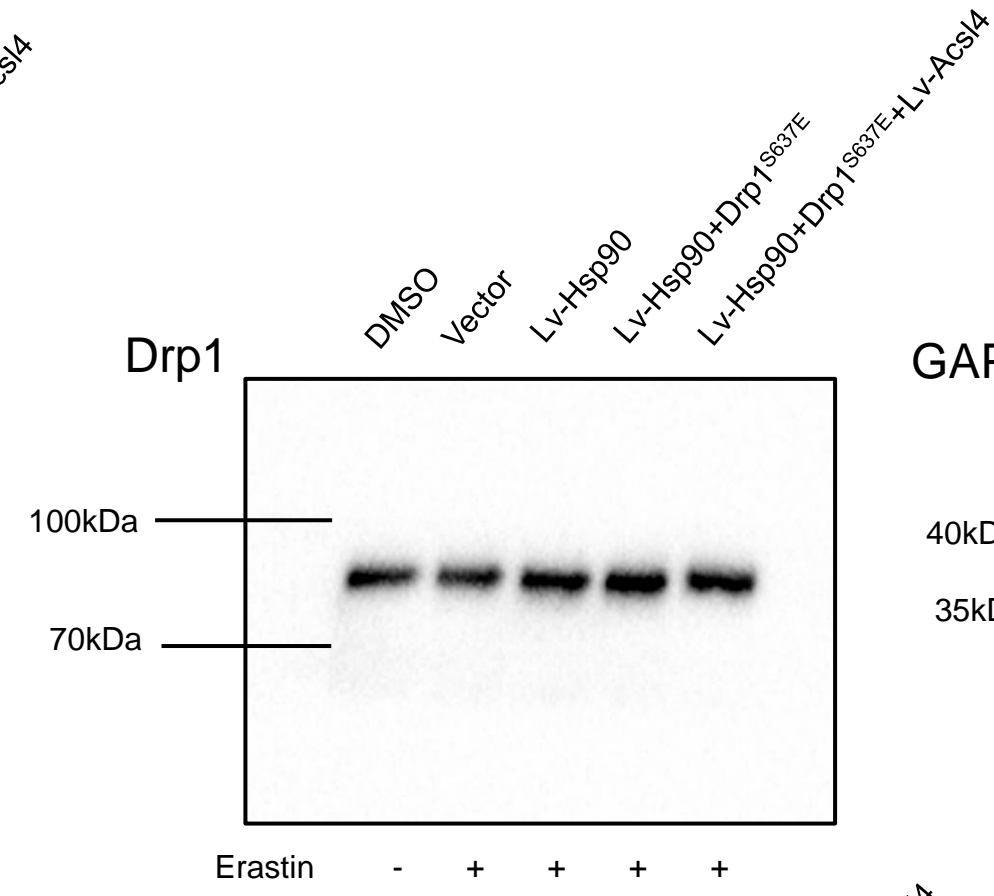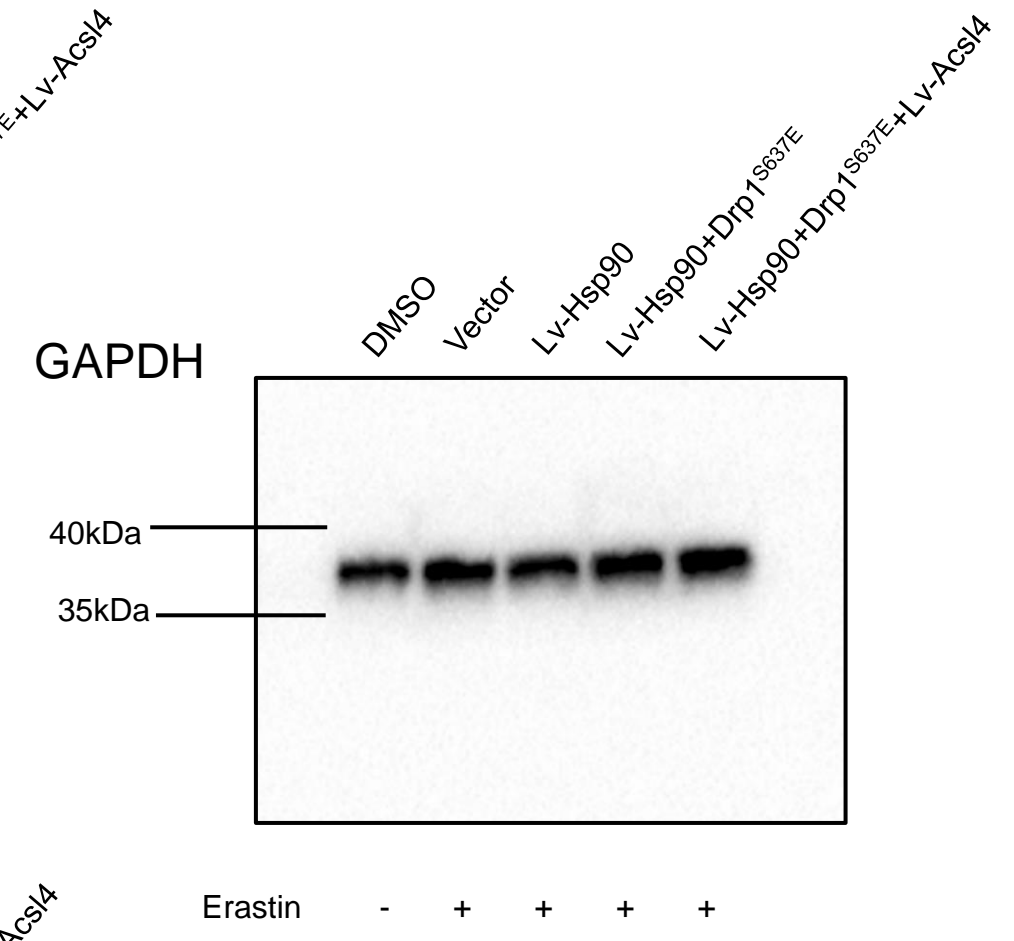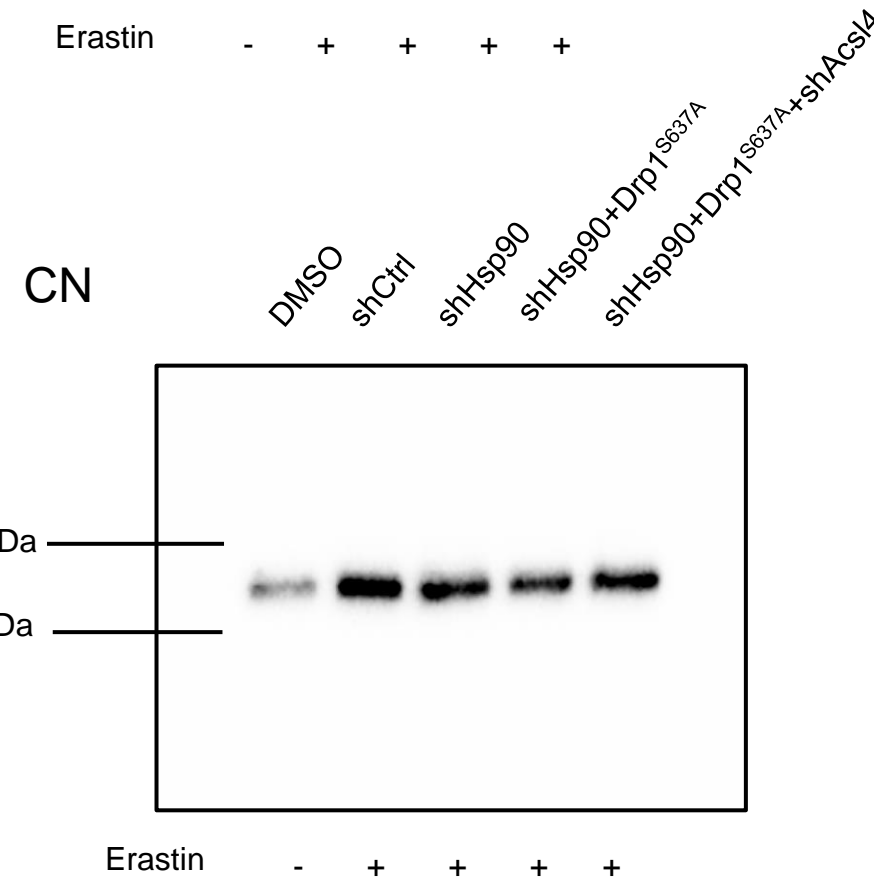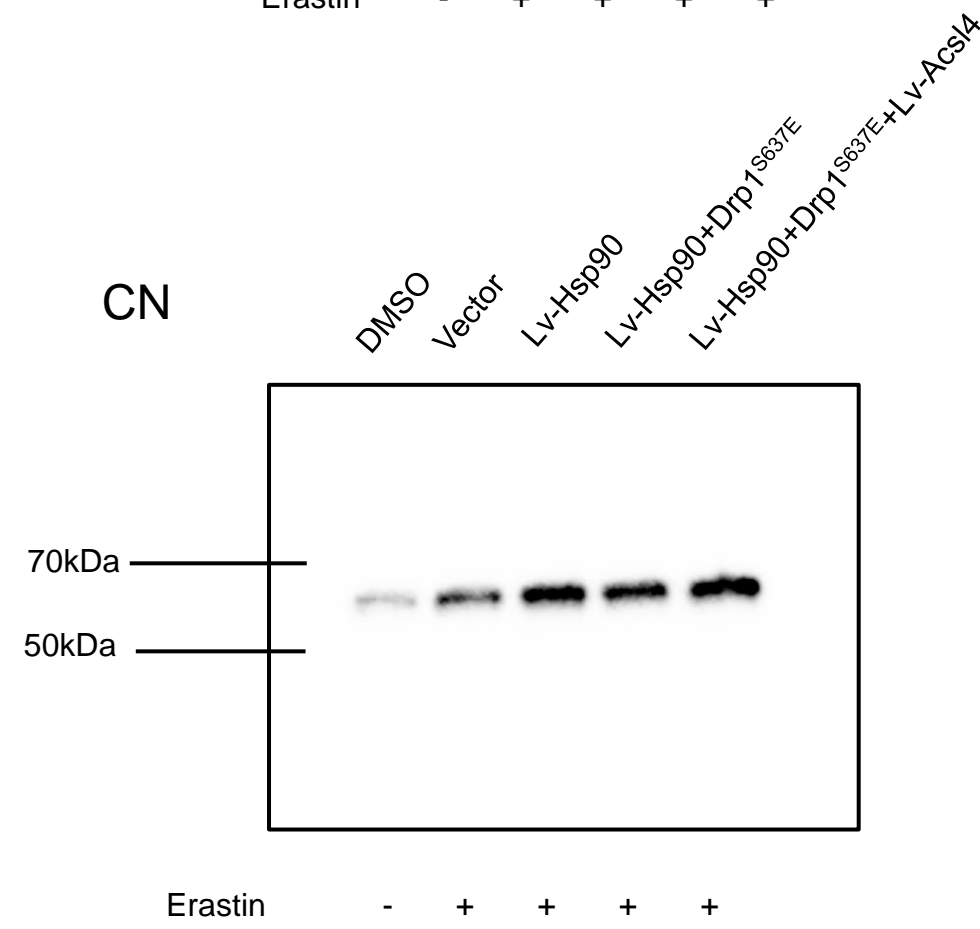

# Supplement Fig.1A, C

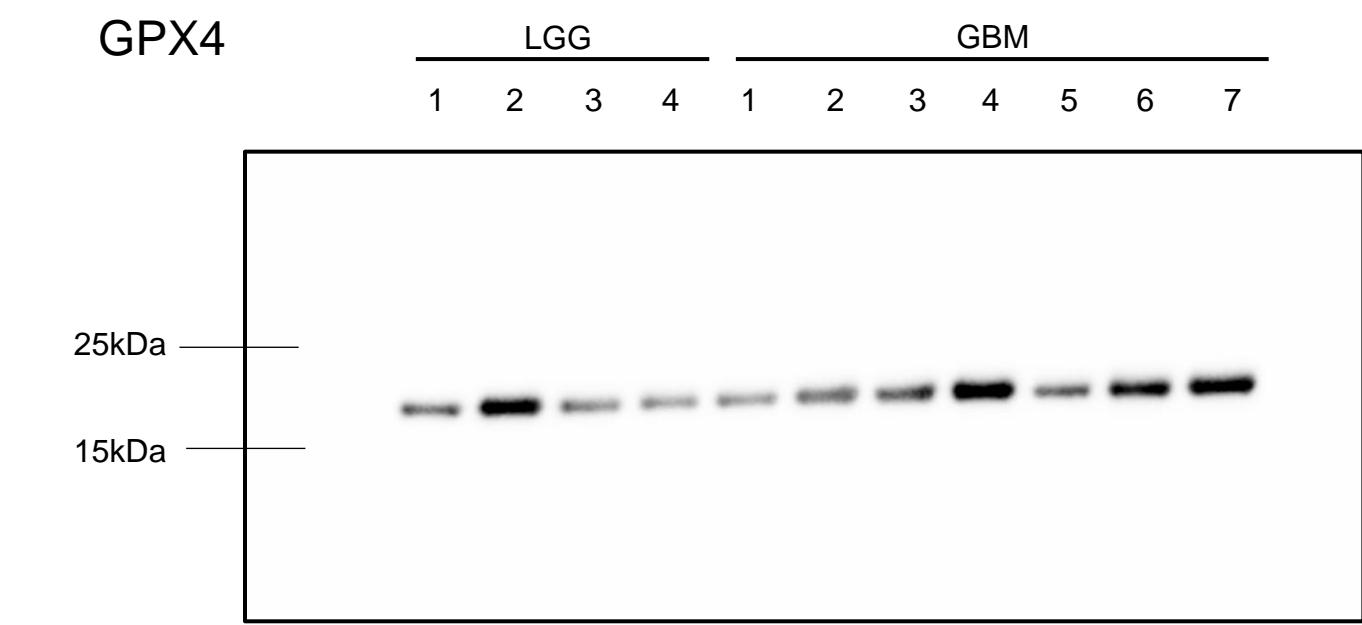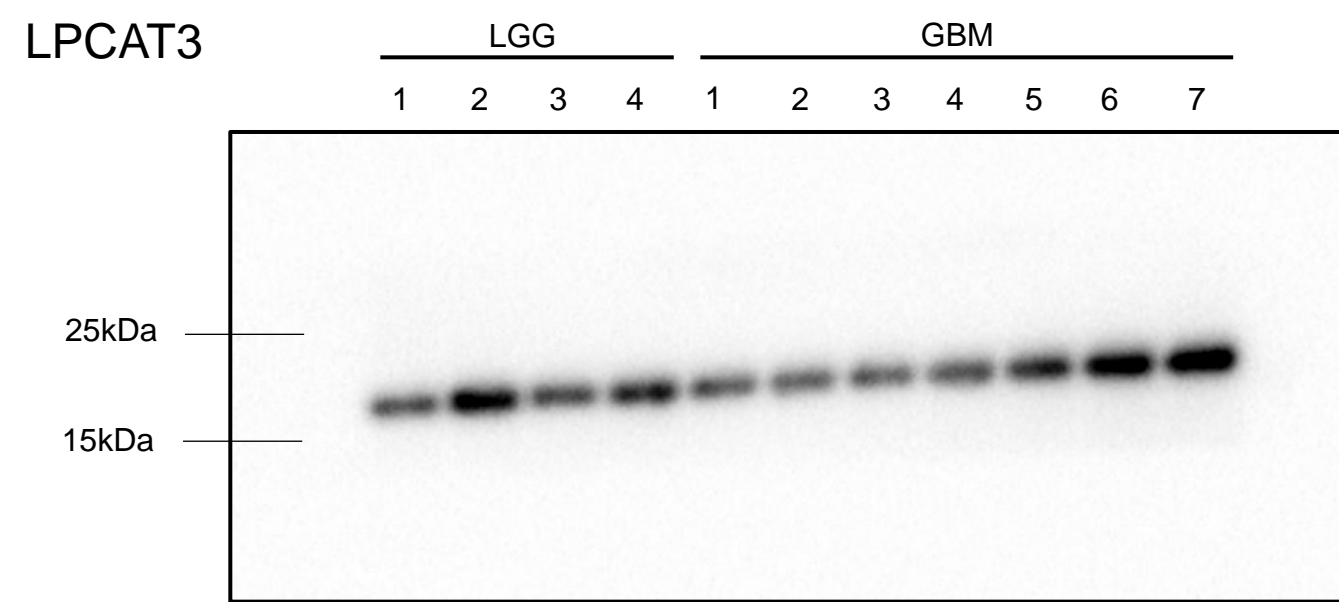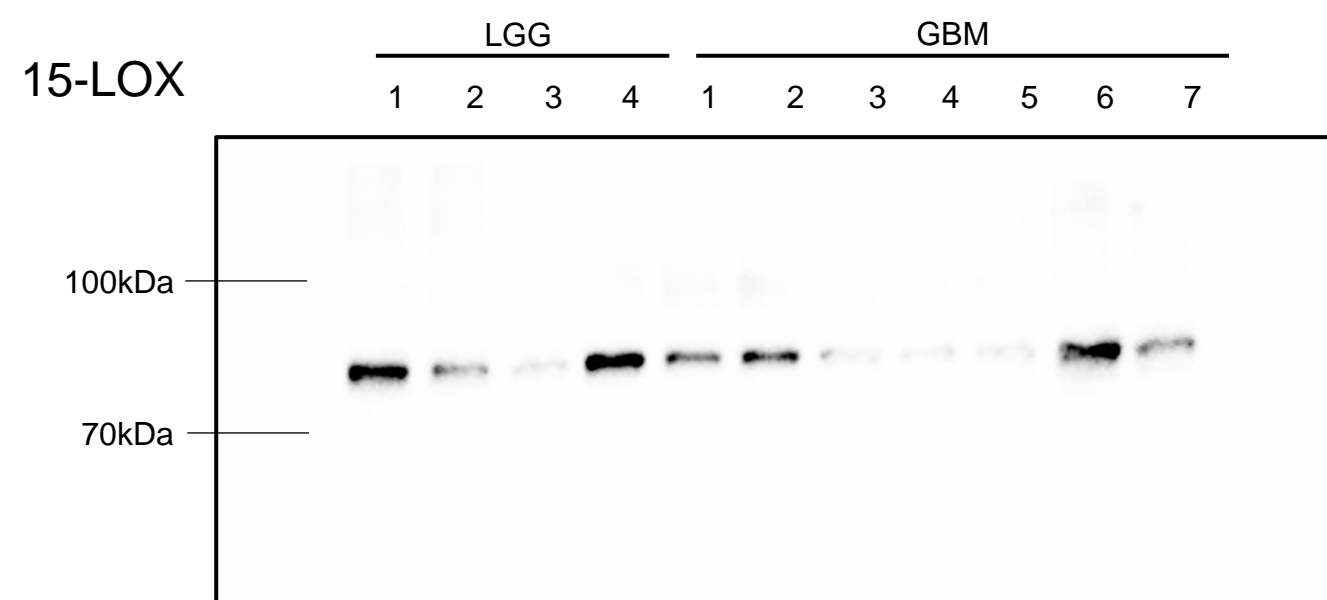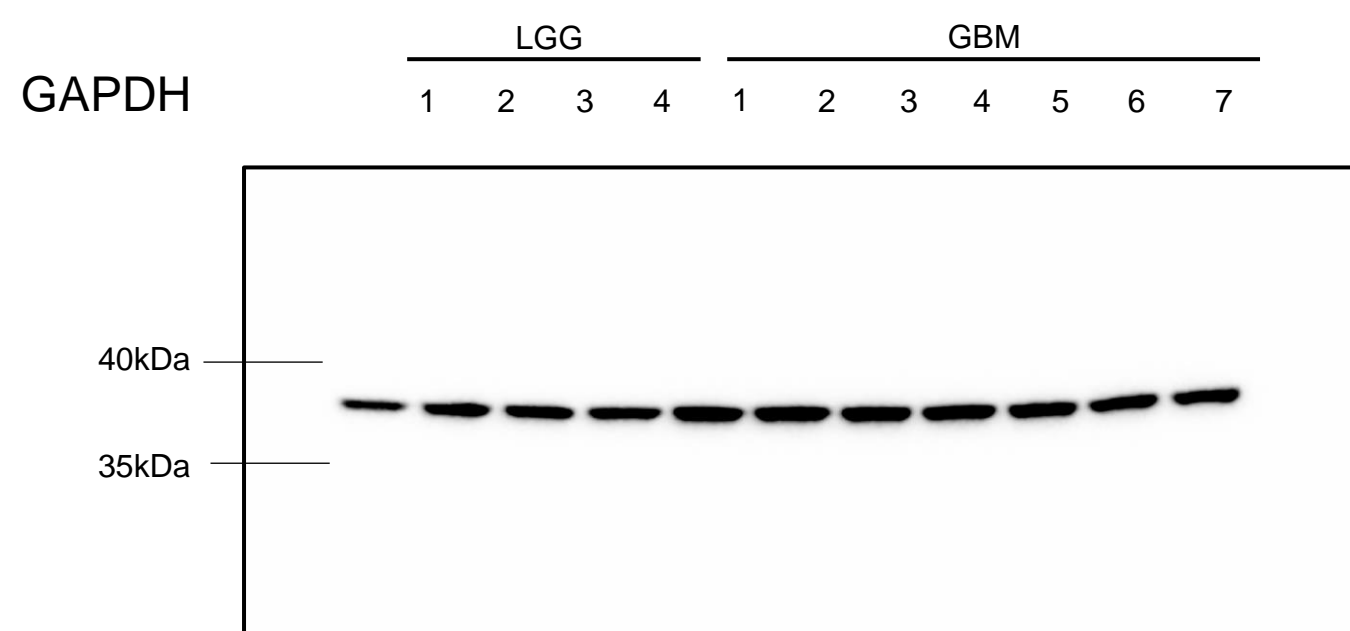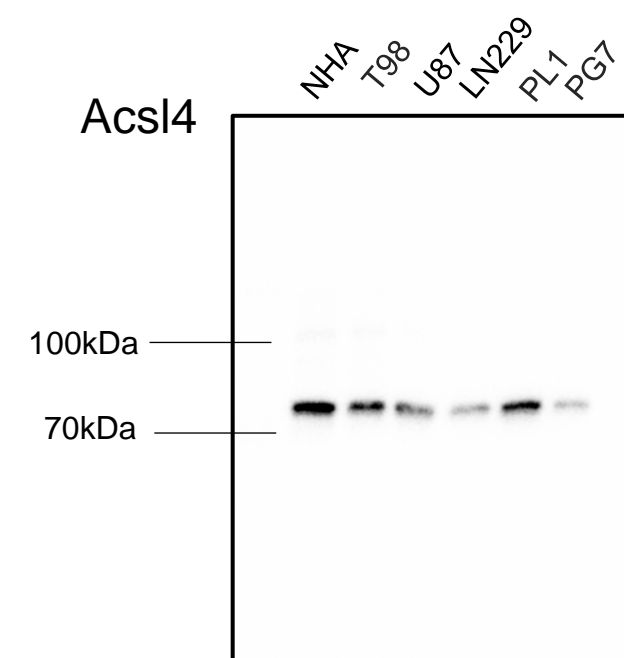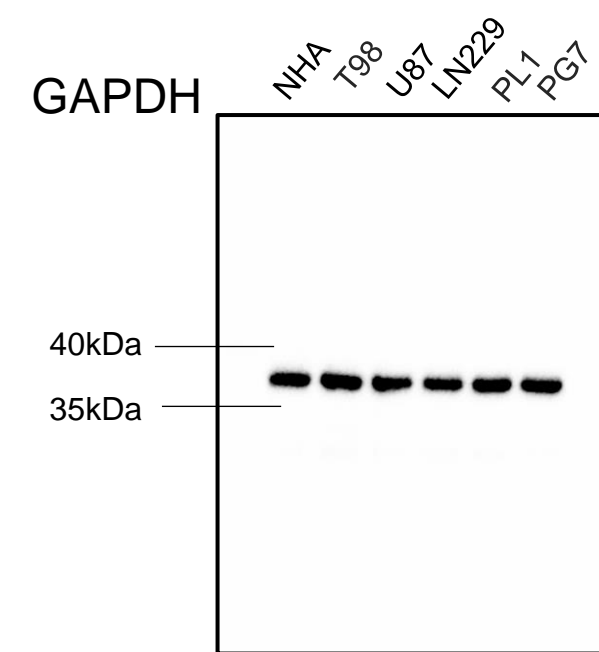

# Supplement Fig.2A, C

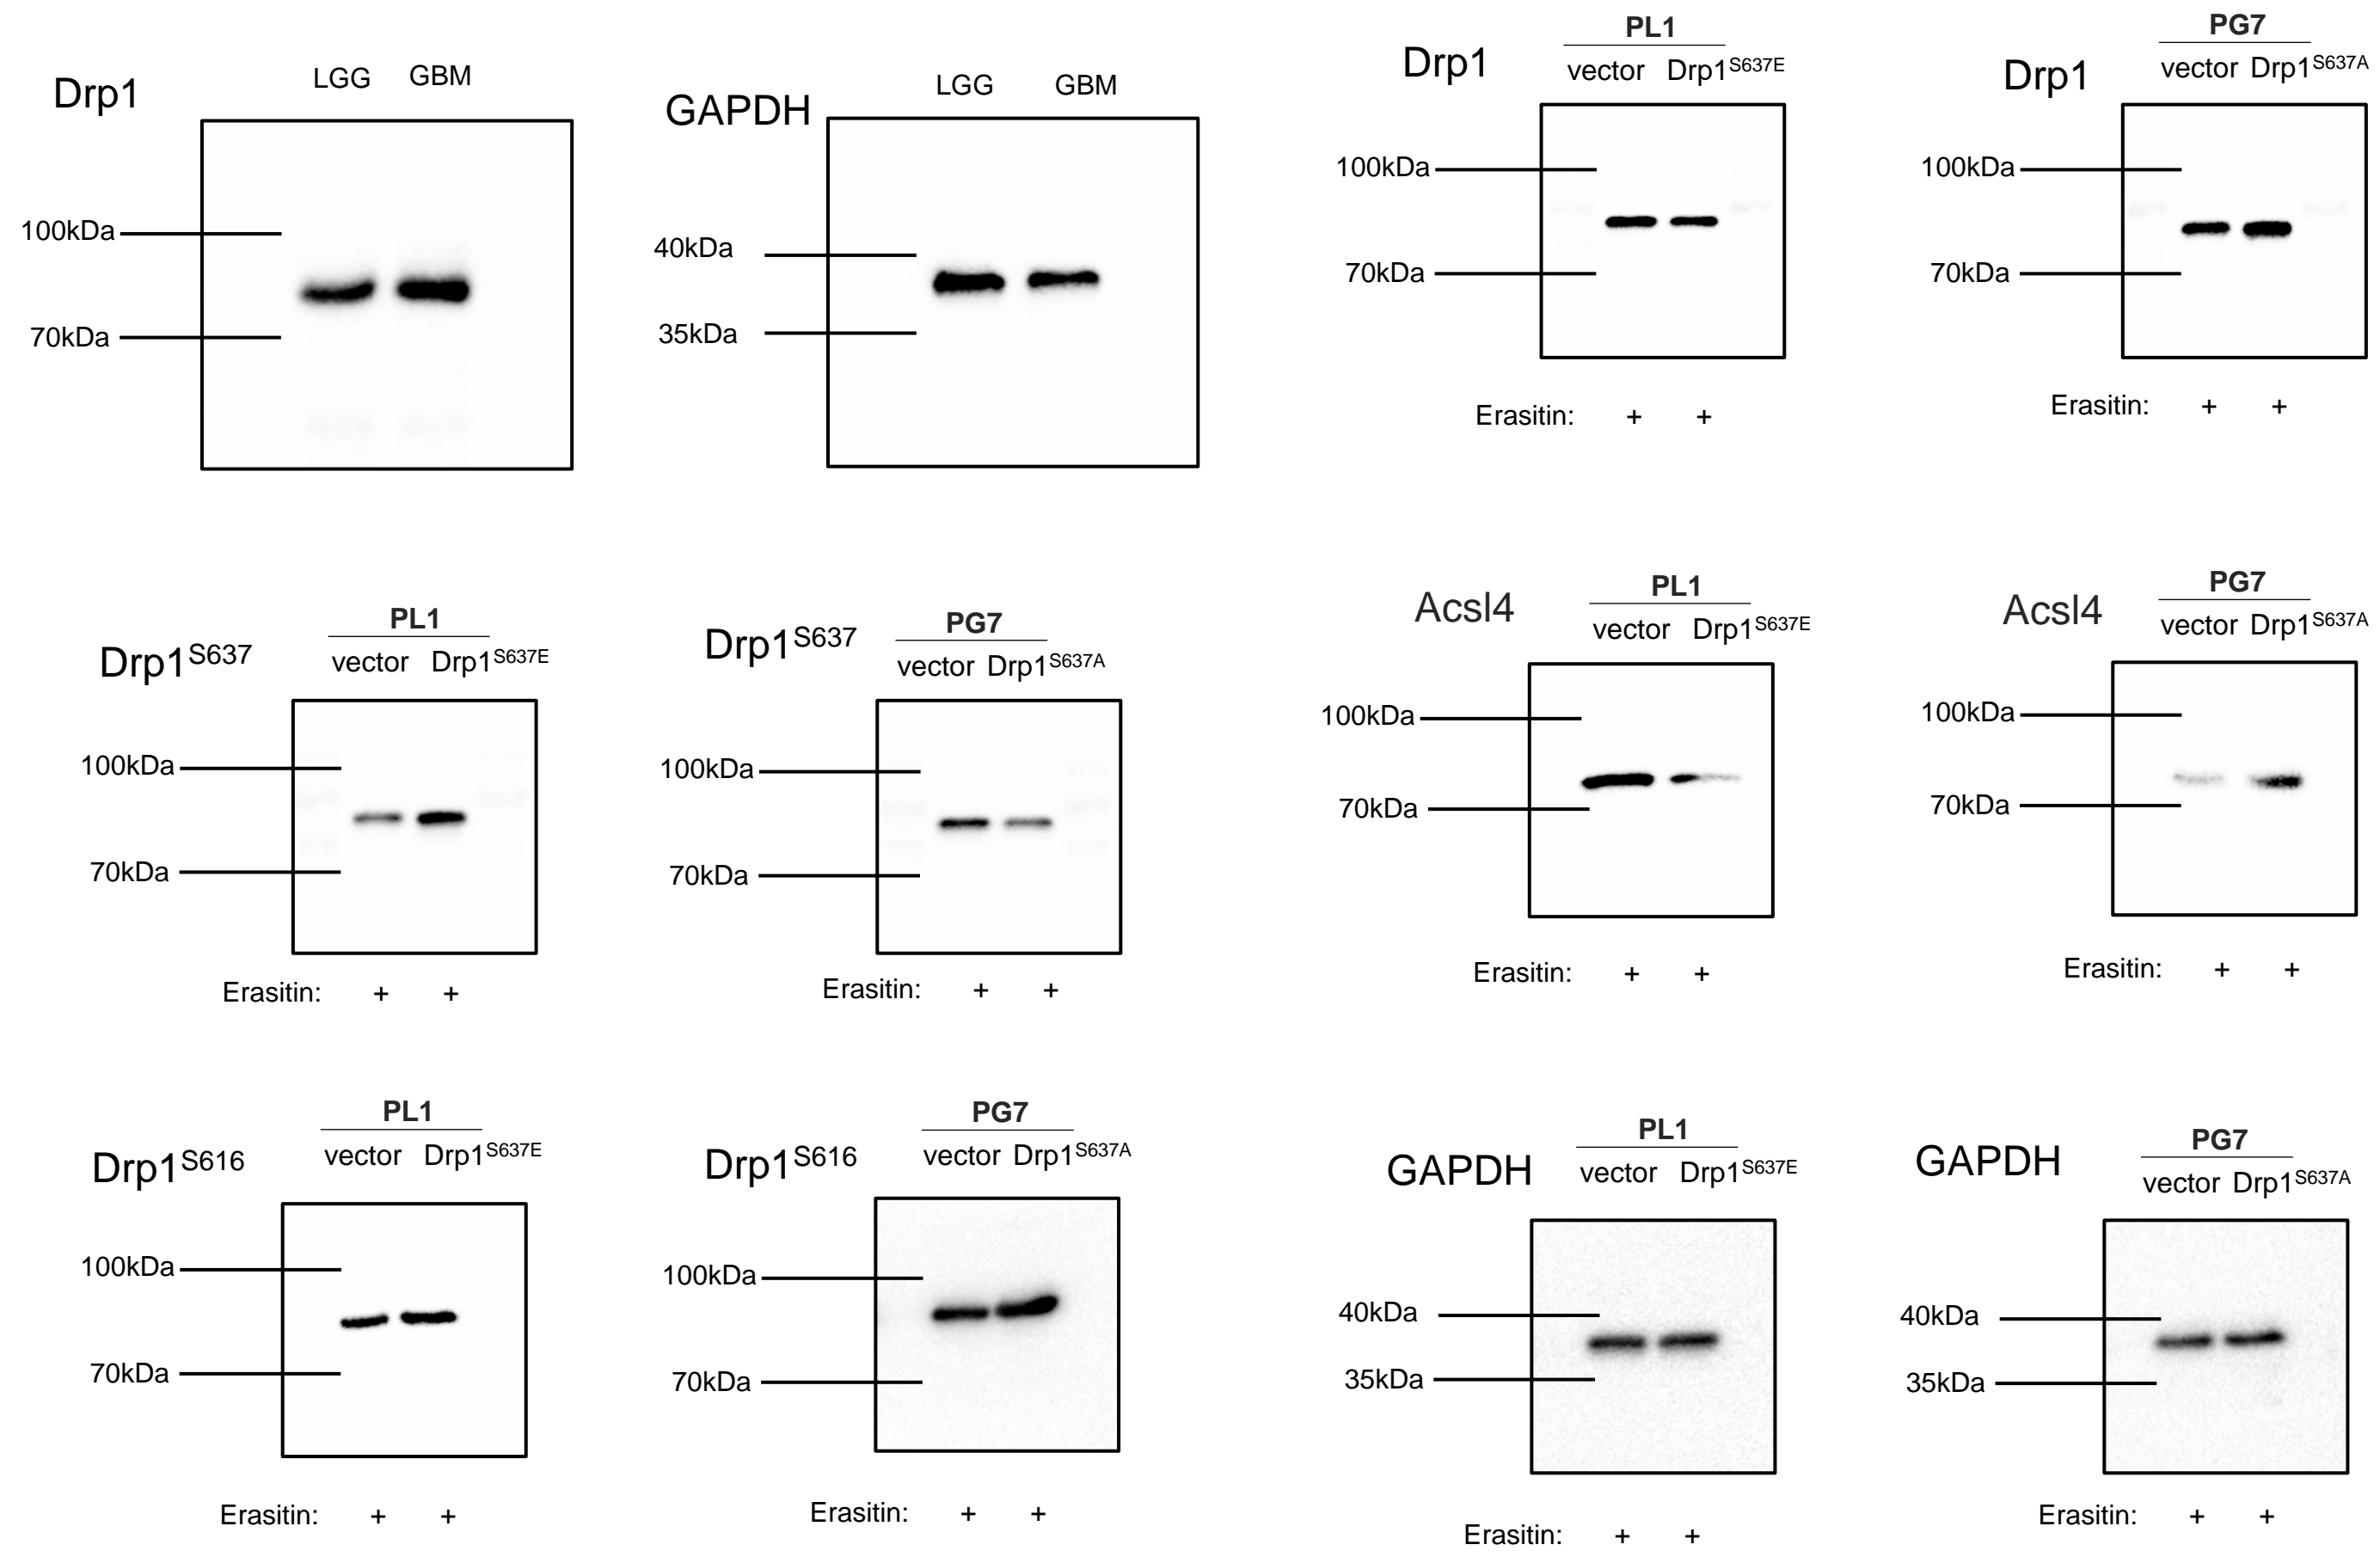



# Supplement Fig.4A, B, D

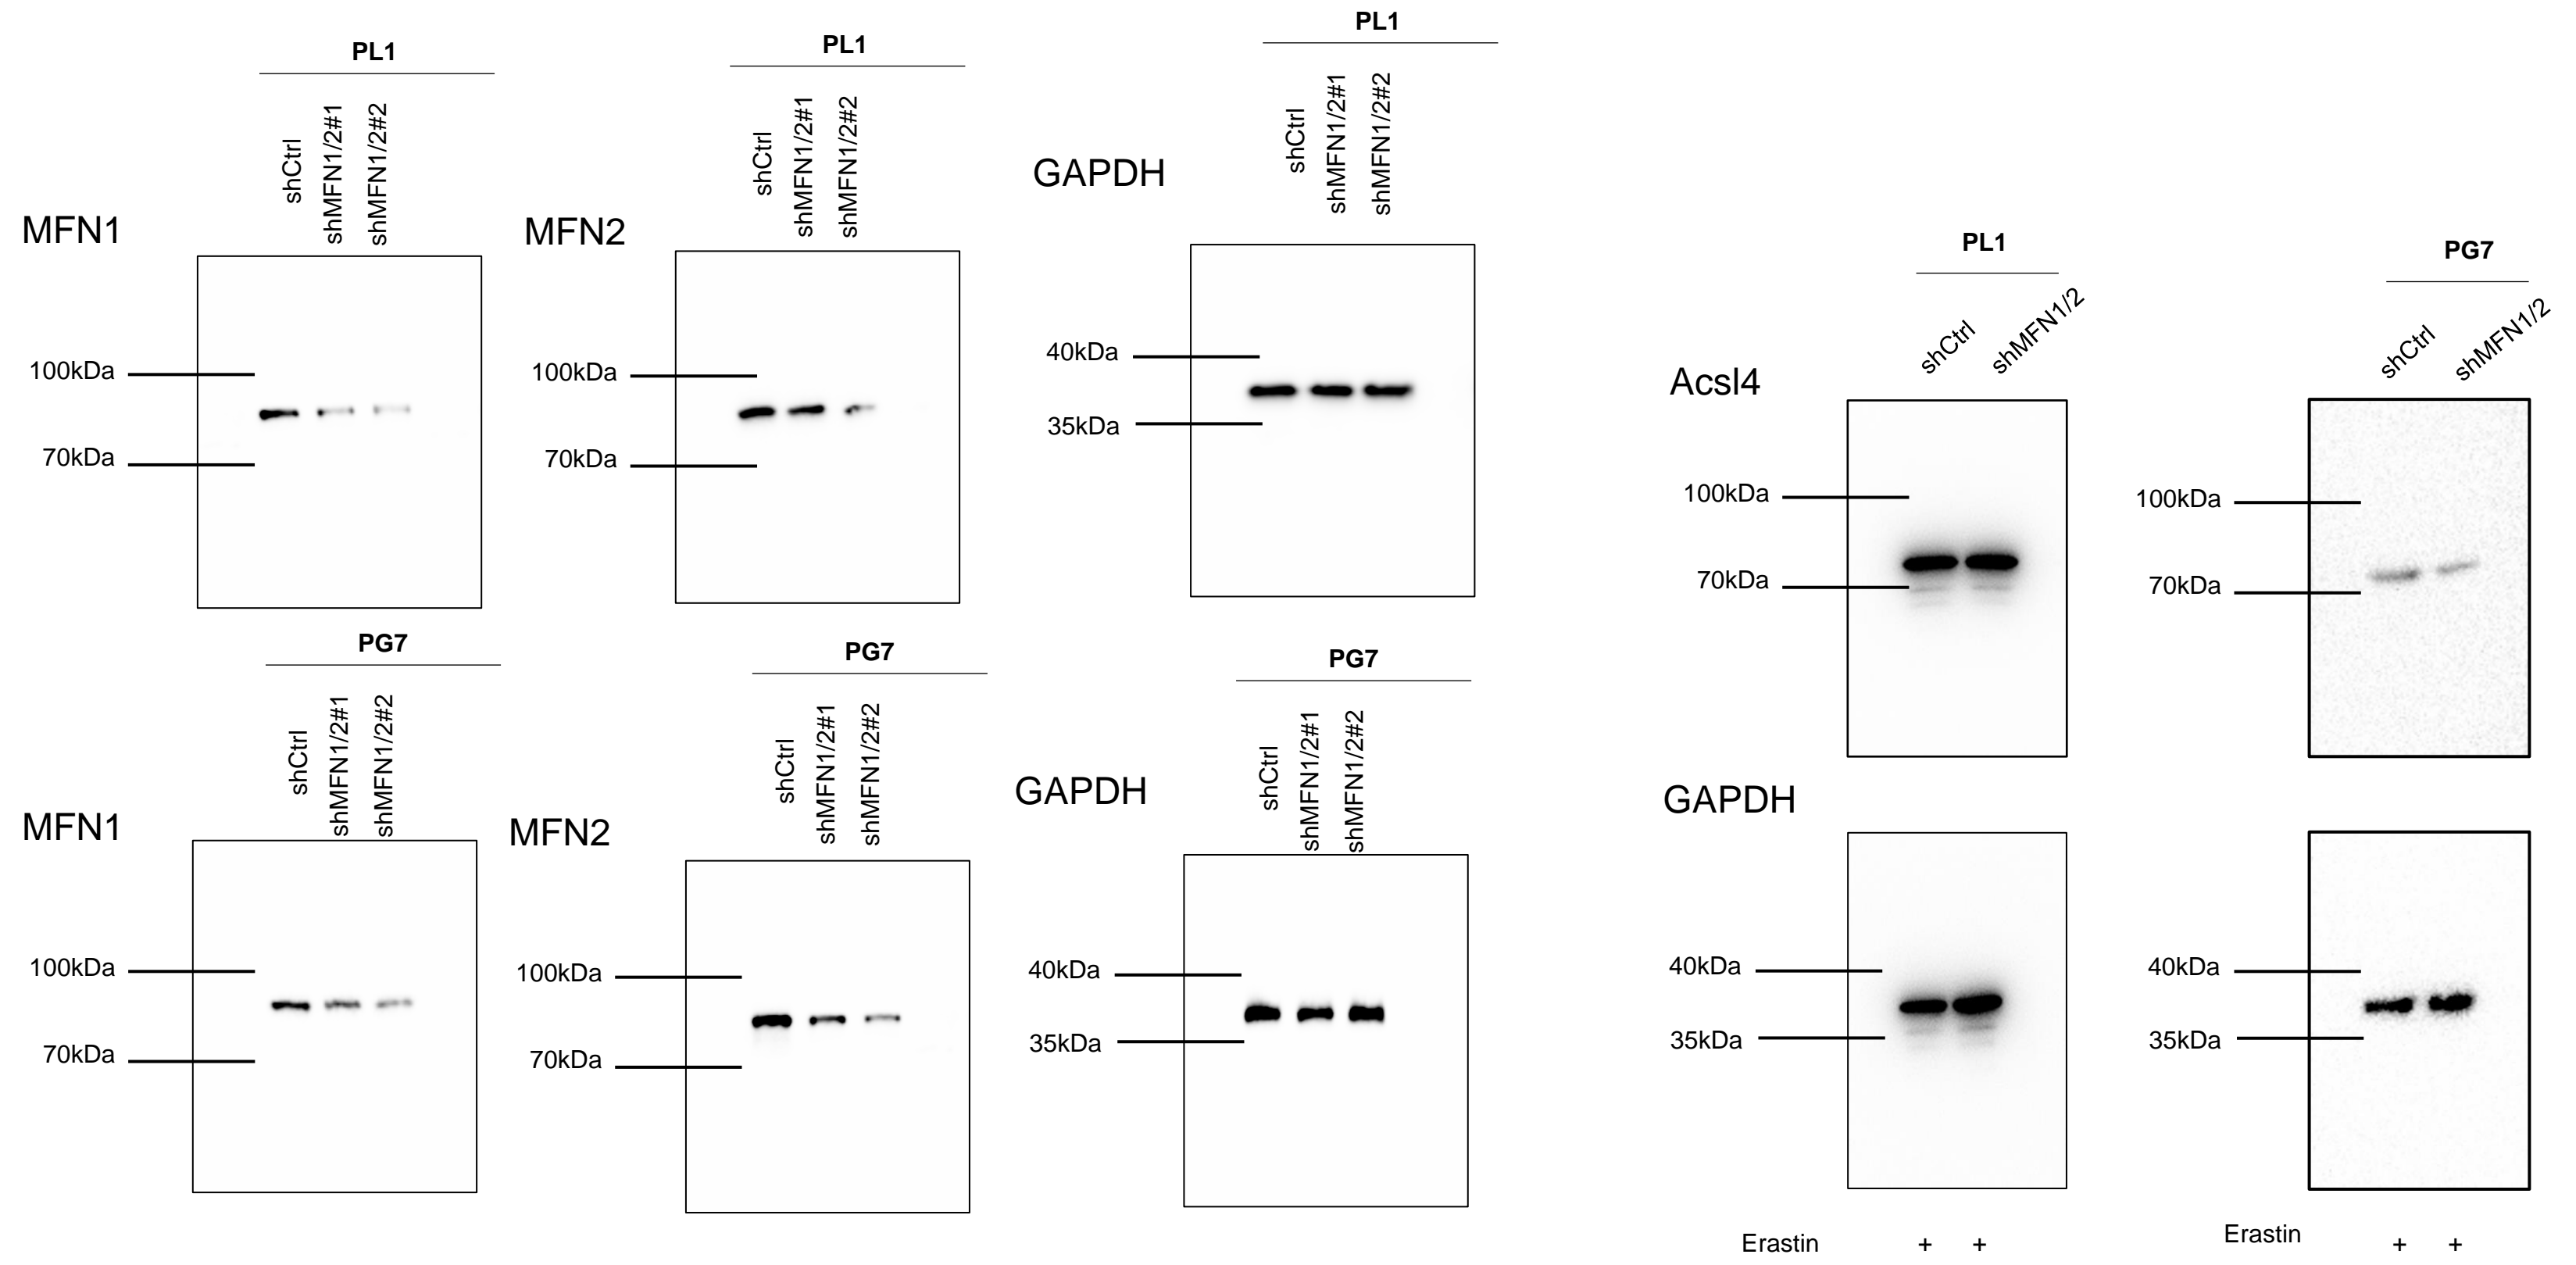

Supplement Fig.5C

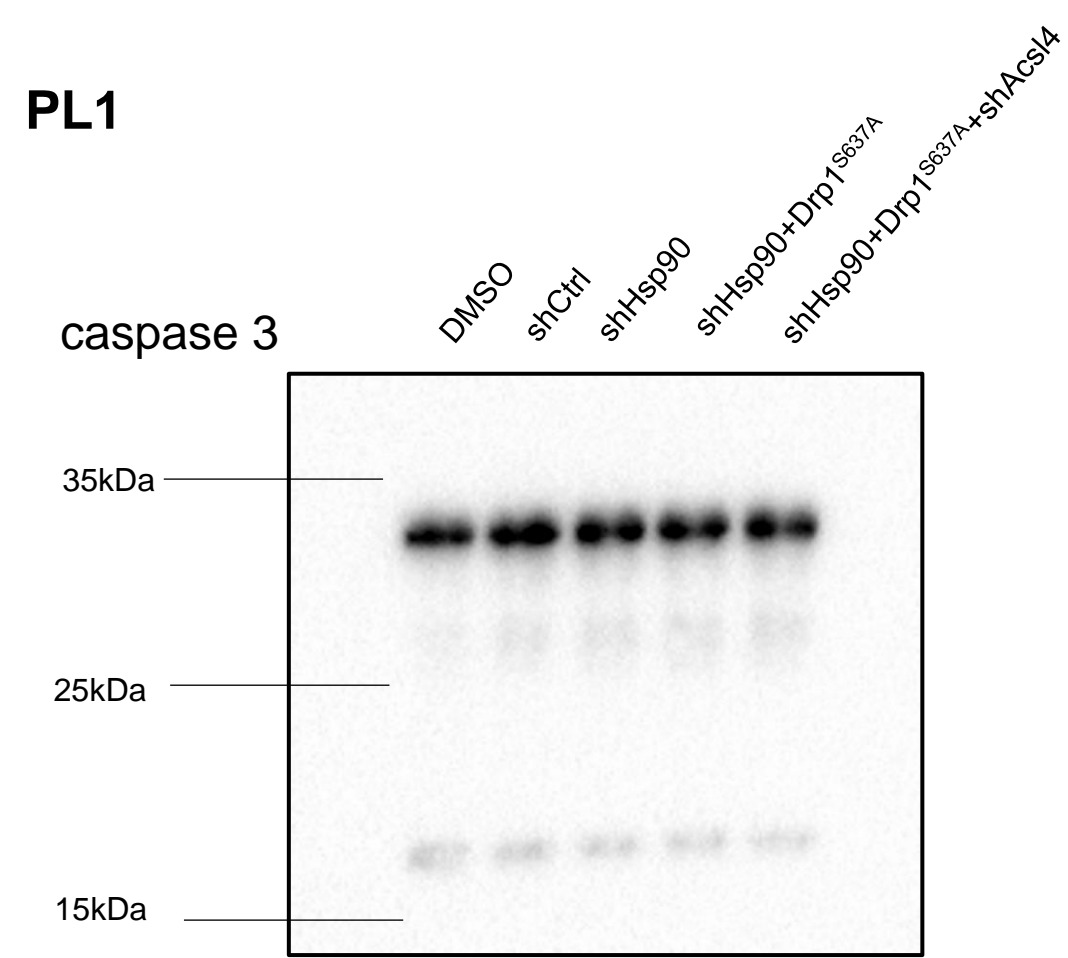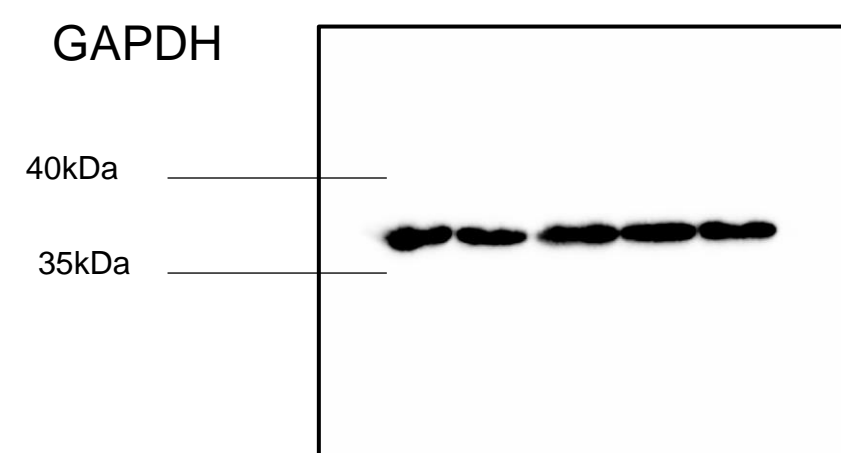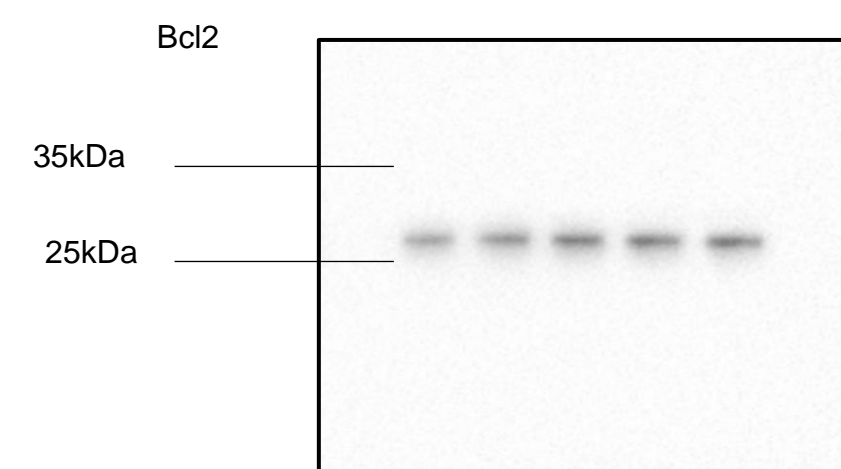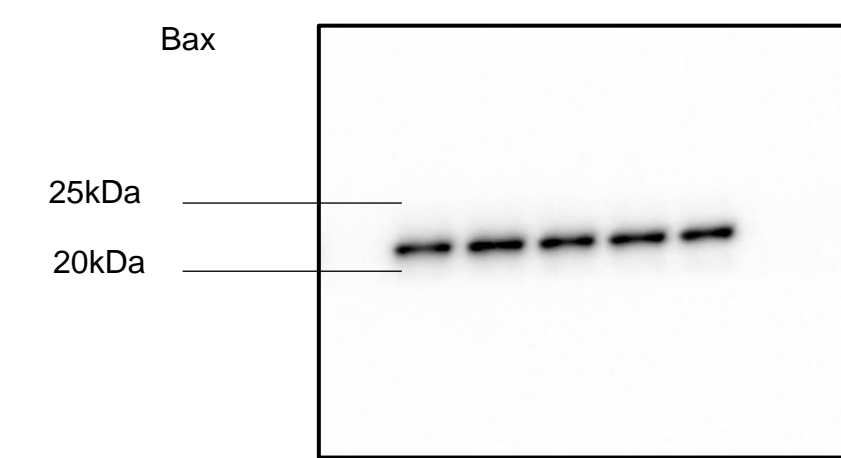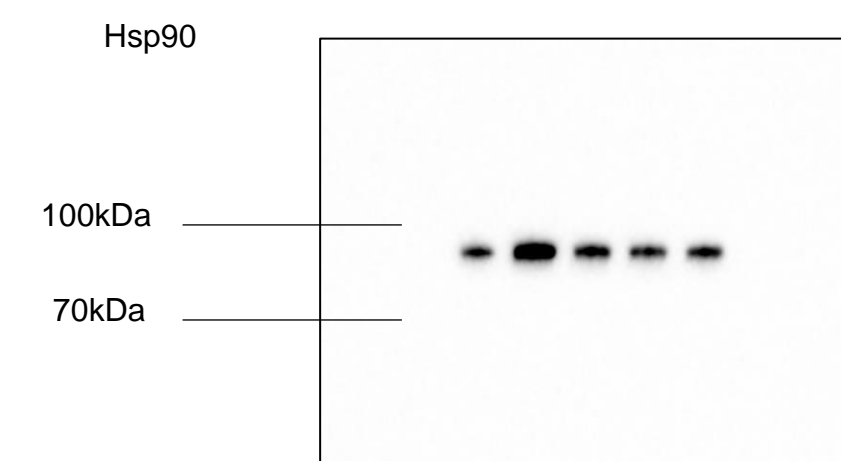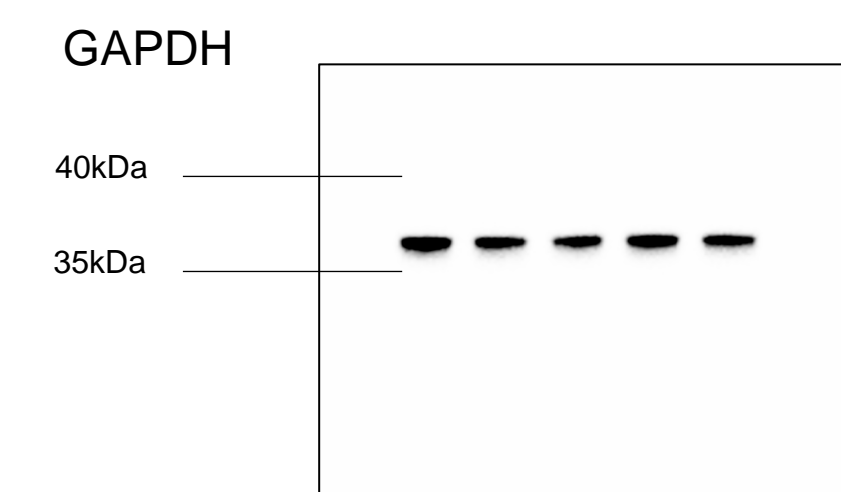

Erastin - + + + +

**PG7**

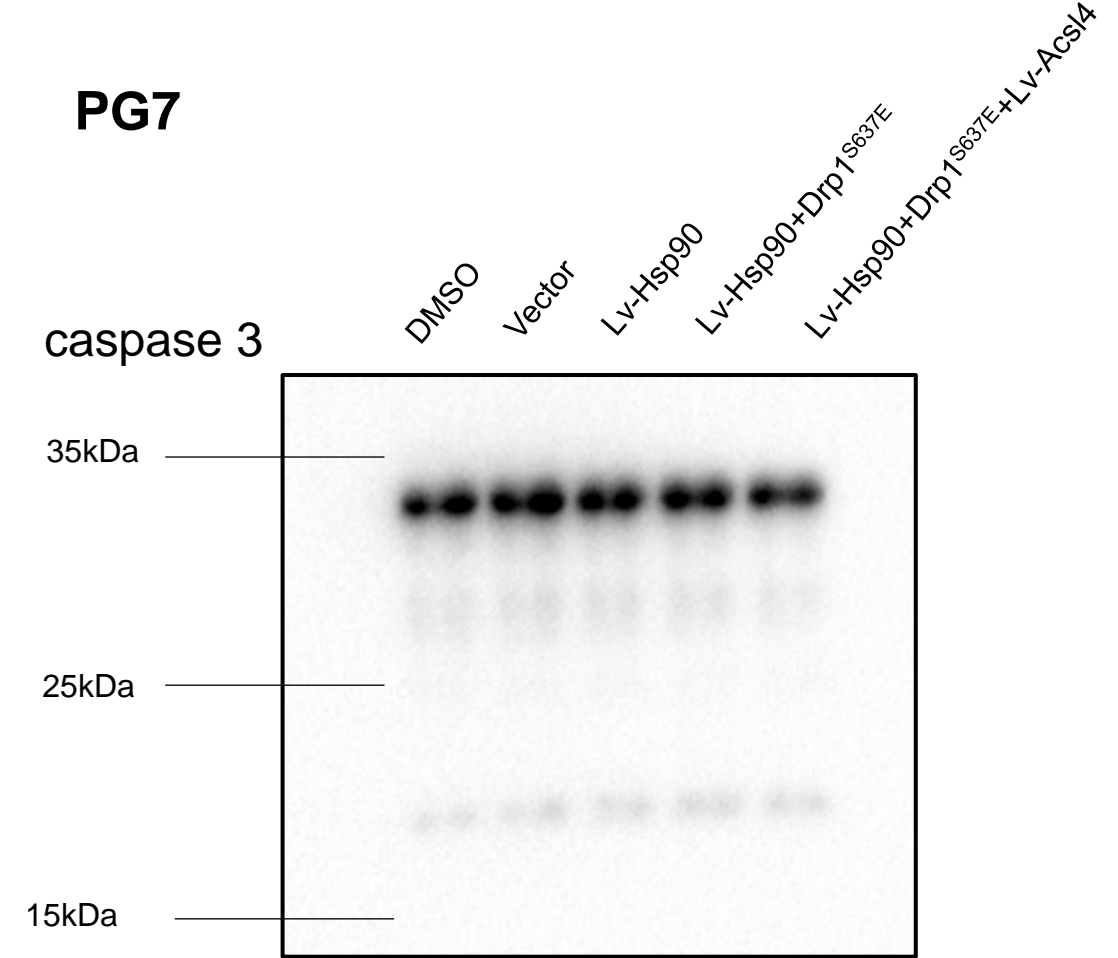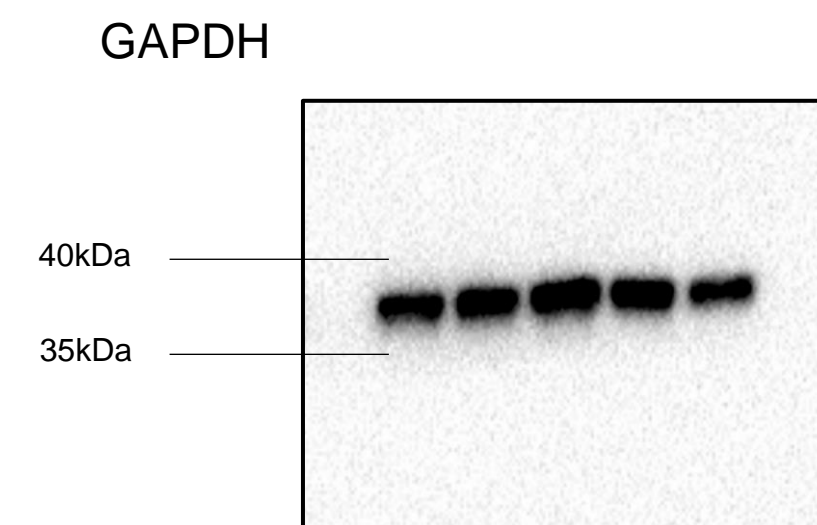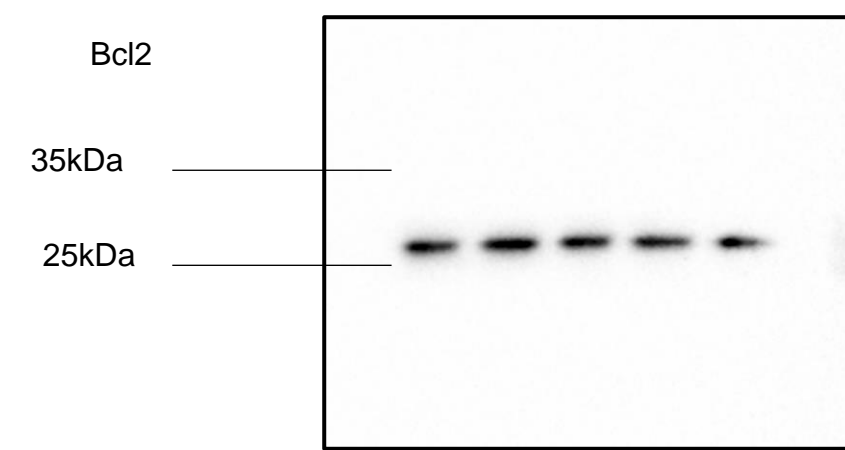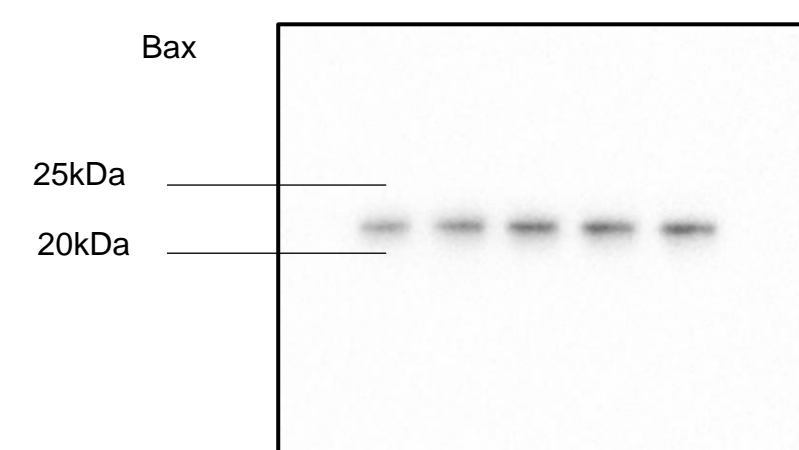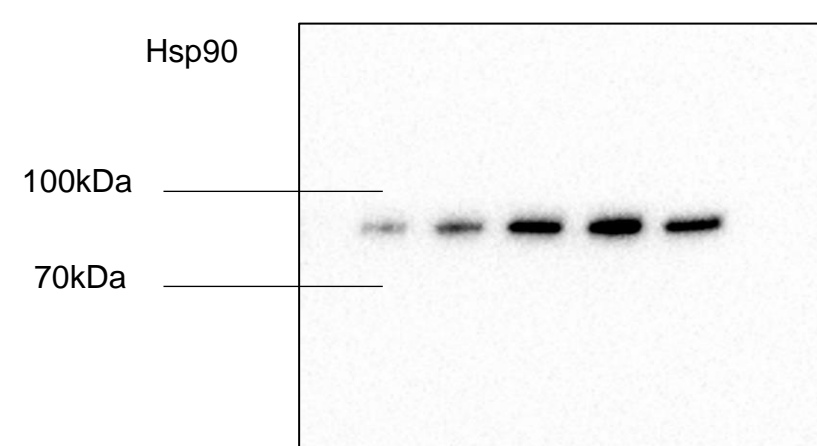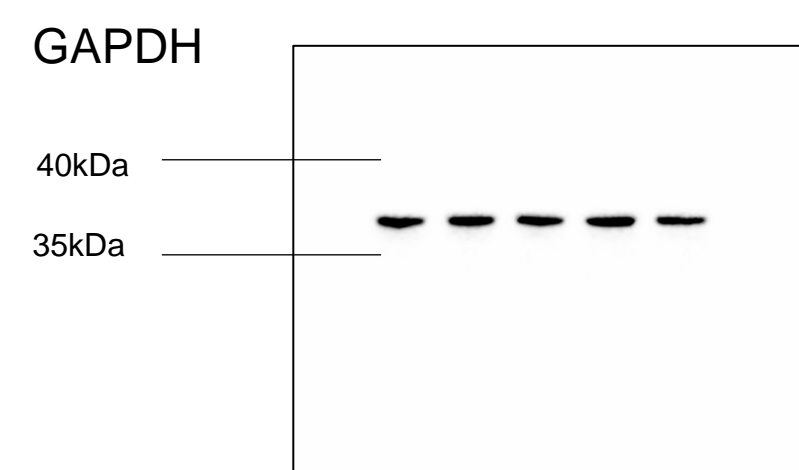

Erastin - + + + +

Supplement Fig.5D

# rebuttal letter1

| Vehicle | Flag-Hsp90 |   |   |
|---------|------------|---|---|
|         | +          | - | - |
| Erastin | -          | + | + |
| shAcsl4 | -          | - | + |

| Vehicle | Flag-Hsp90 |   |   |
|---------|------------|---|---|
|         | +          | - | - |
| Erastin | -          | + | + |
| shAcsl4 | -          | - | + |

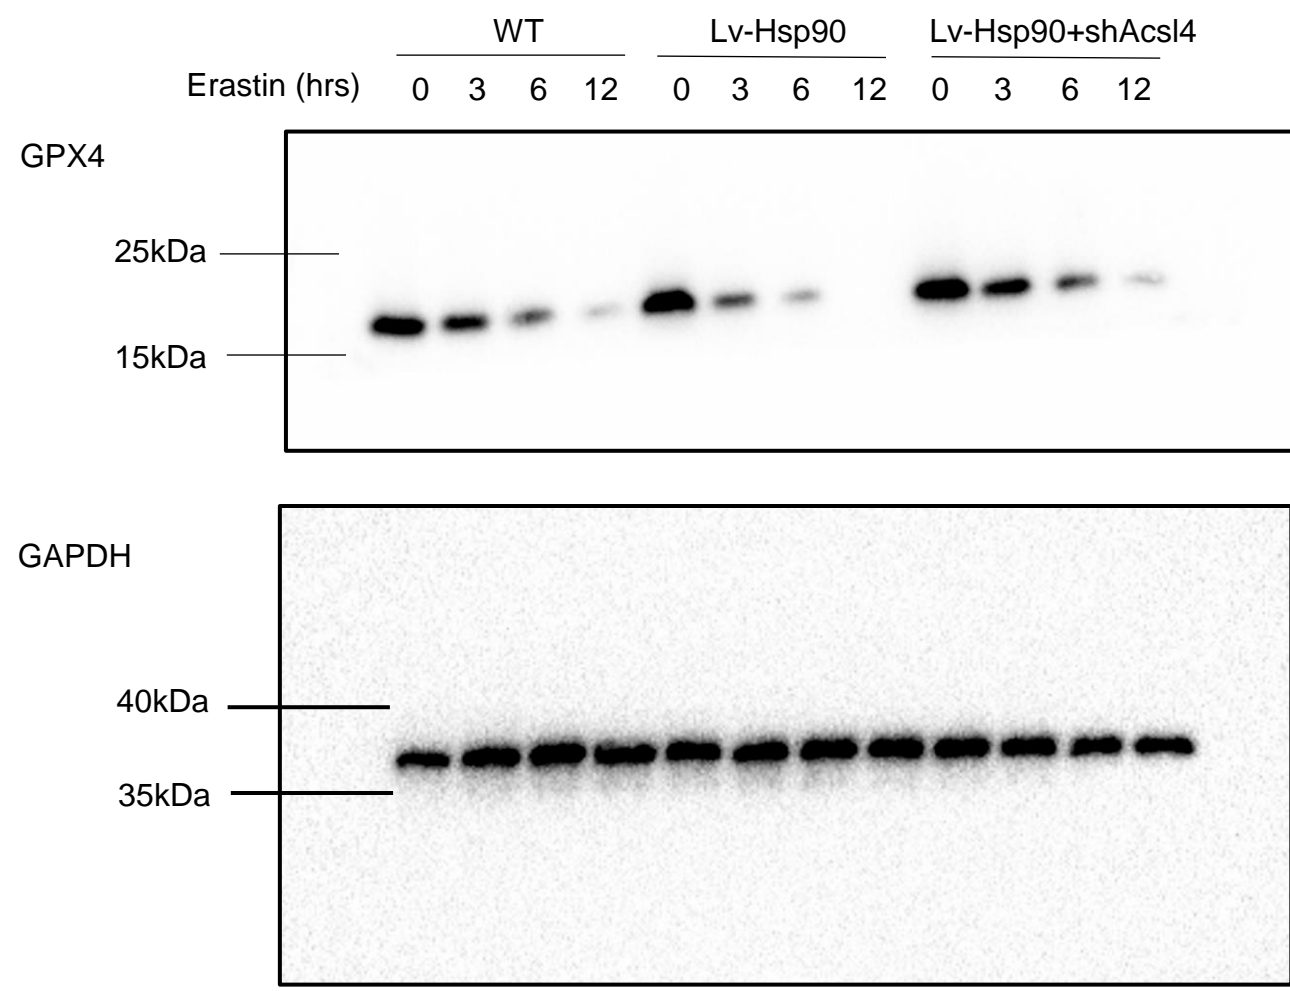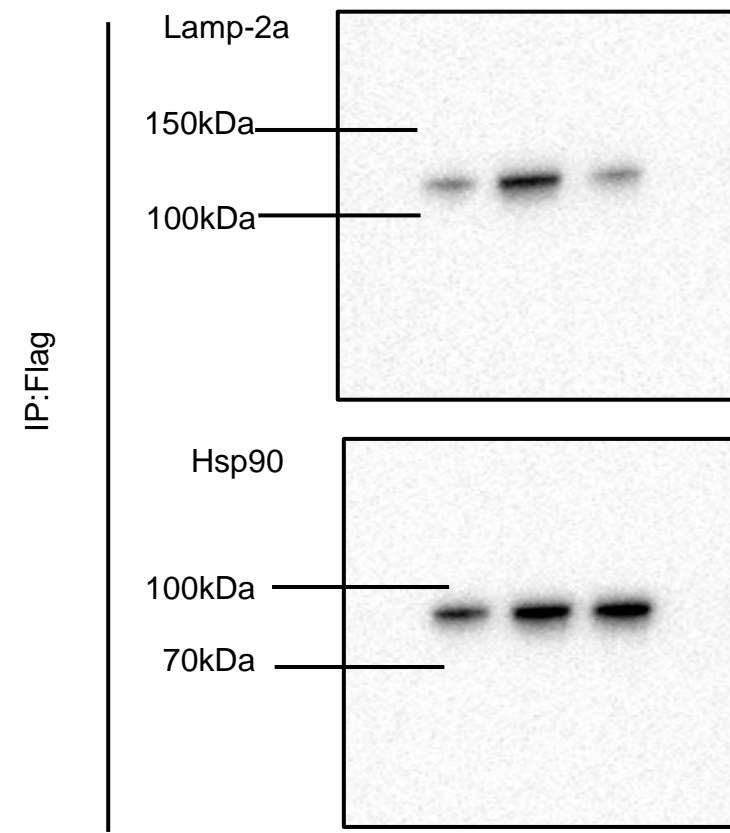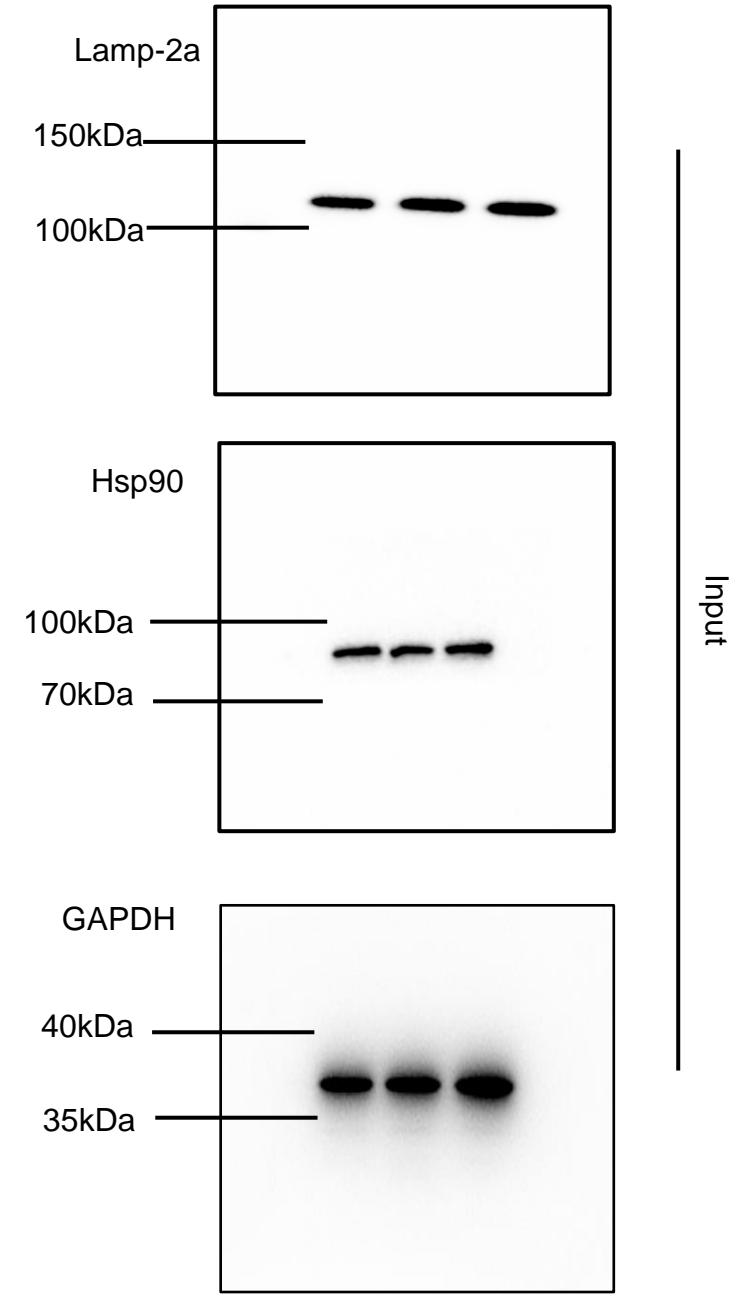

Input

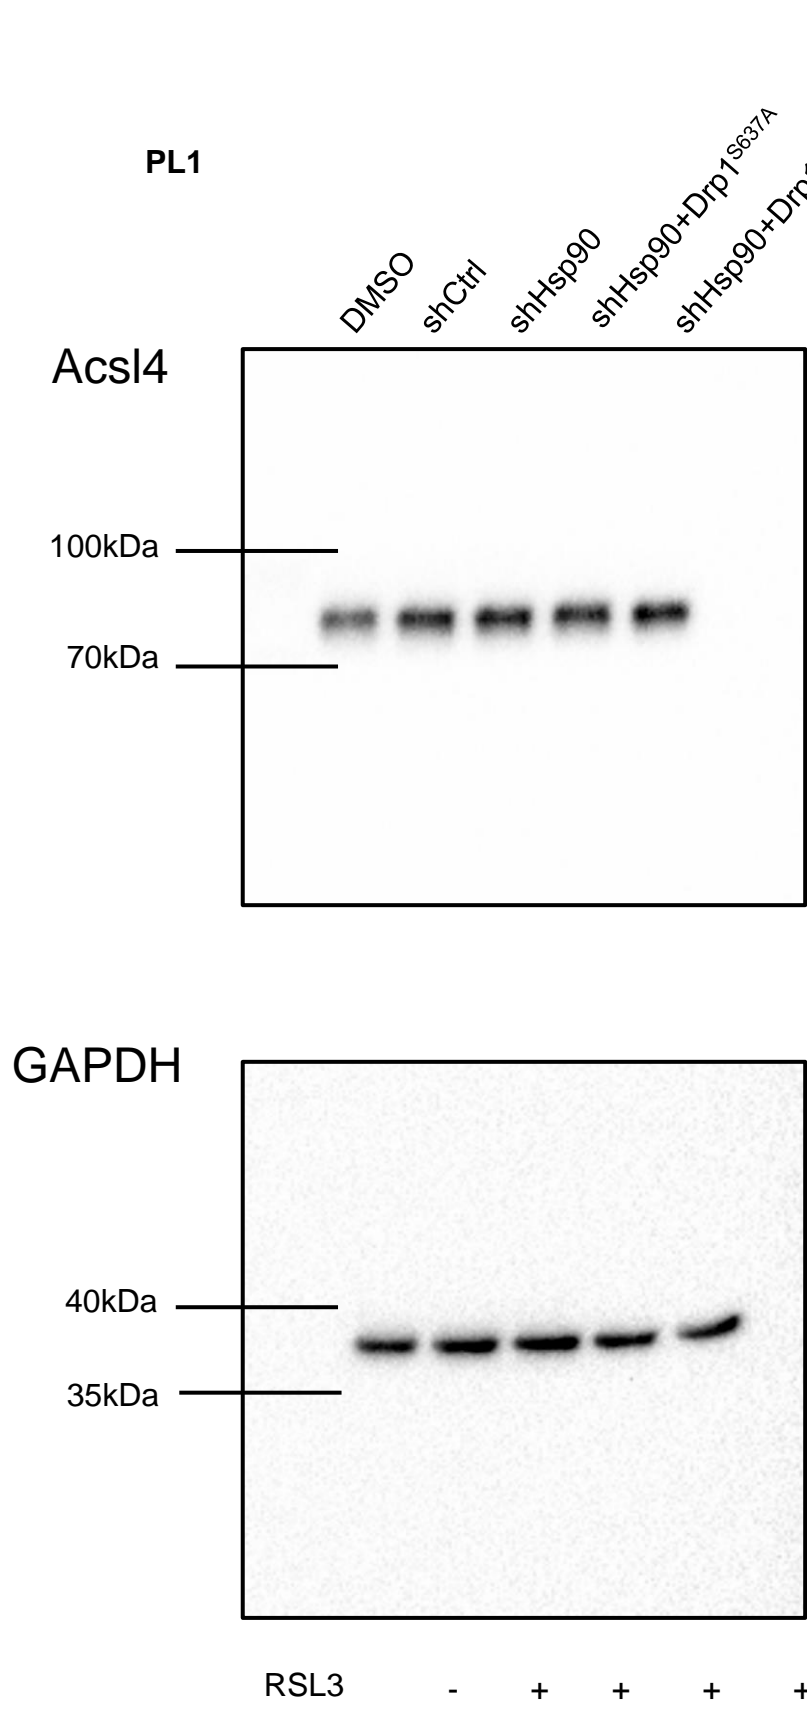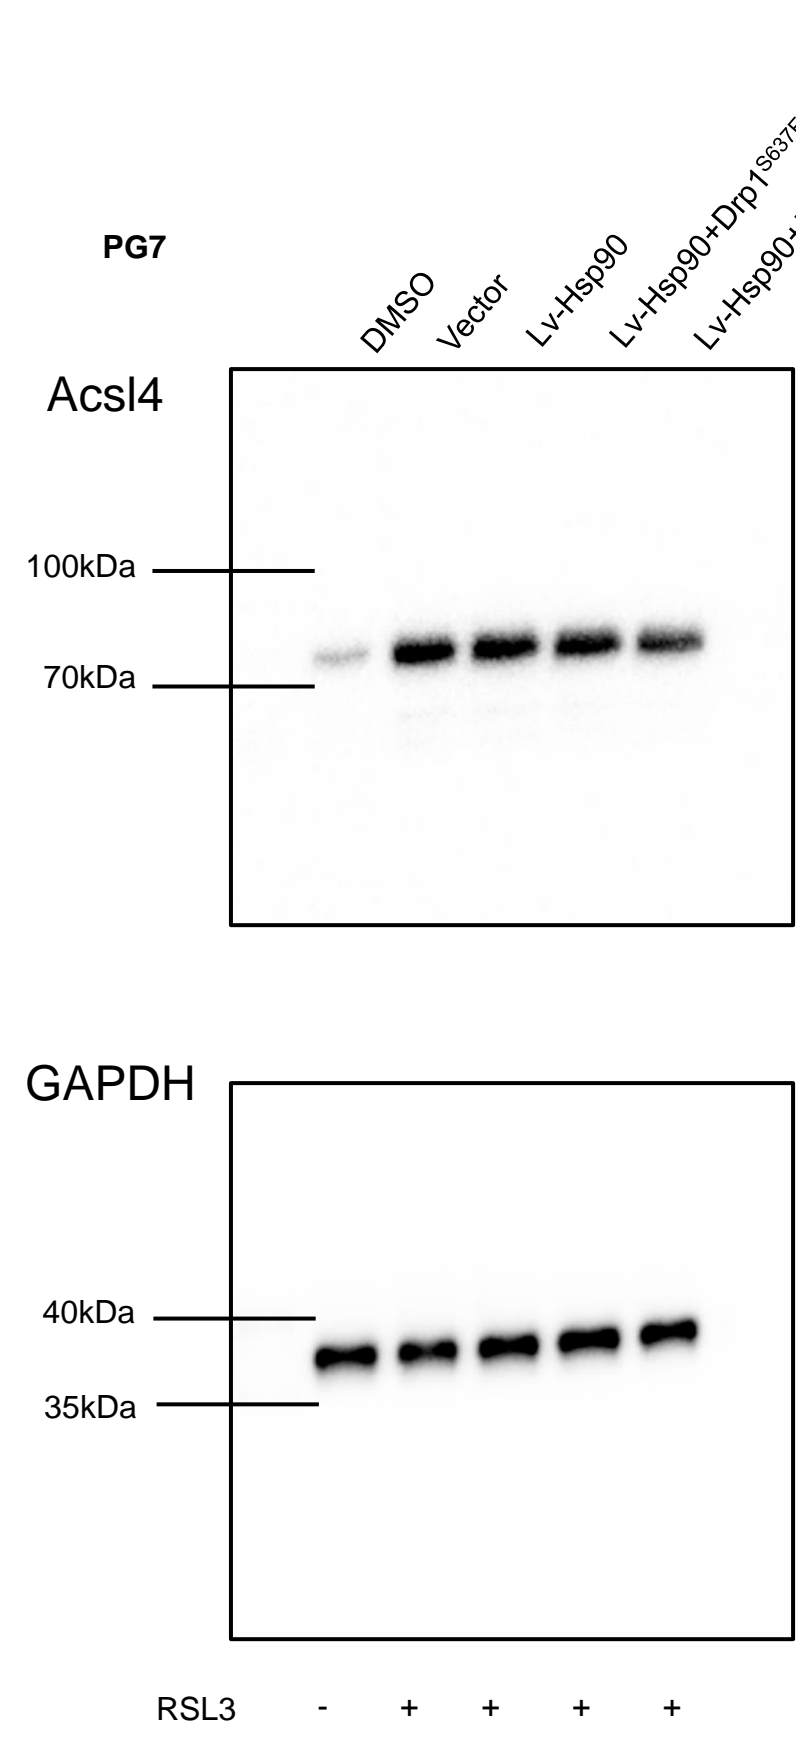

rebuttal letter 2 Q1

PL1 cells

PG7 cells

PL1

PG7

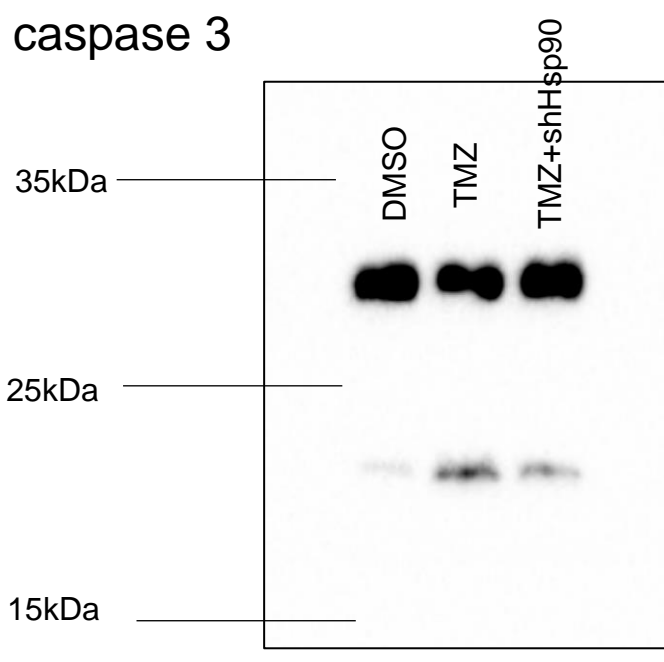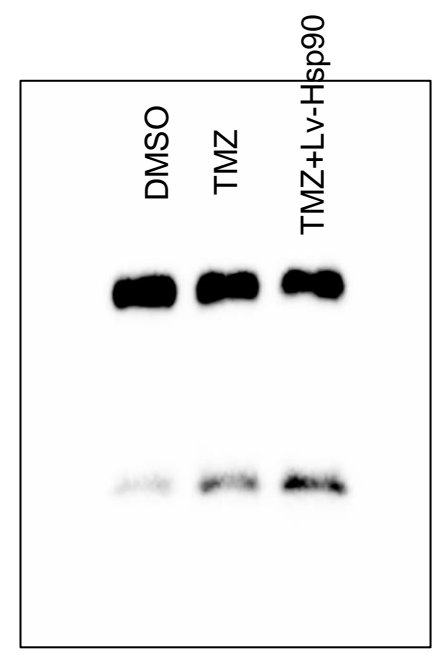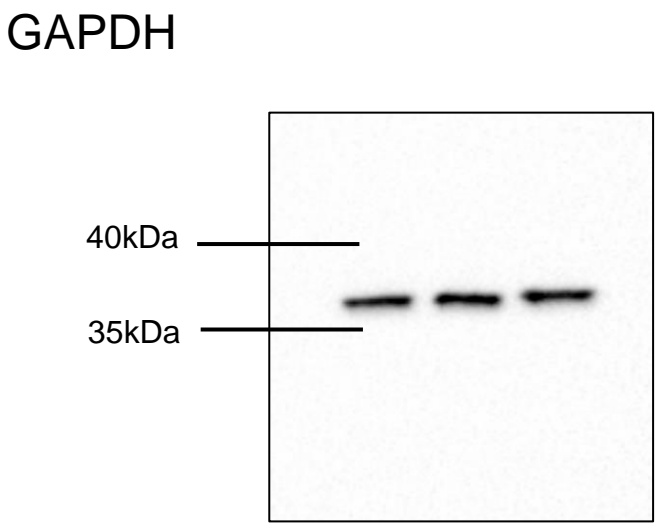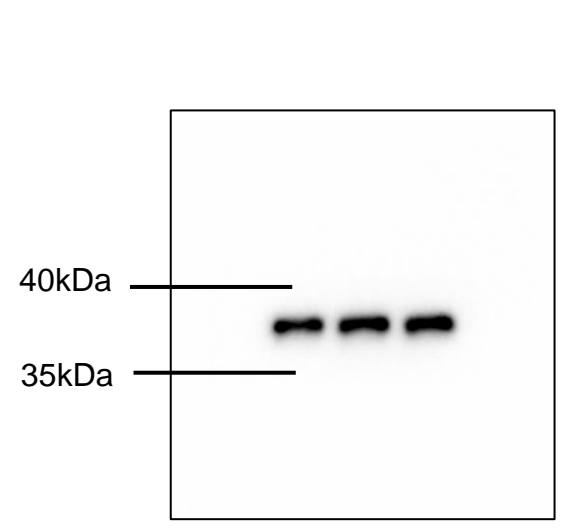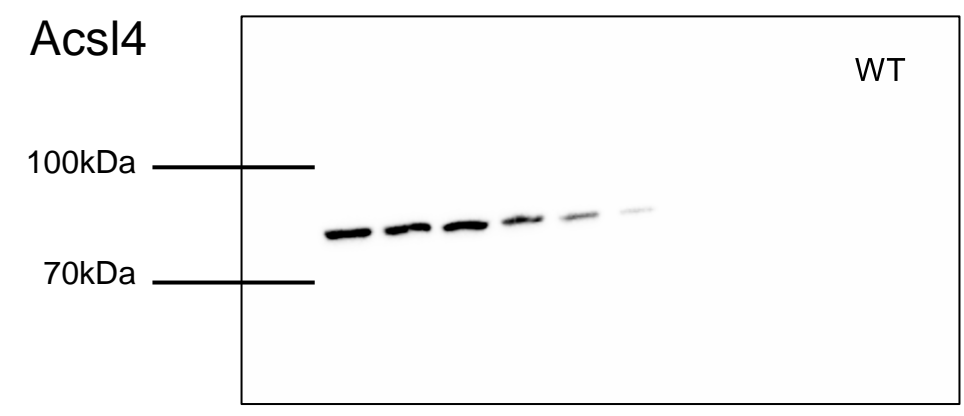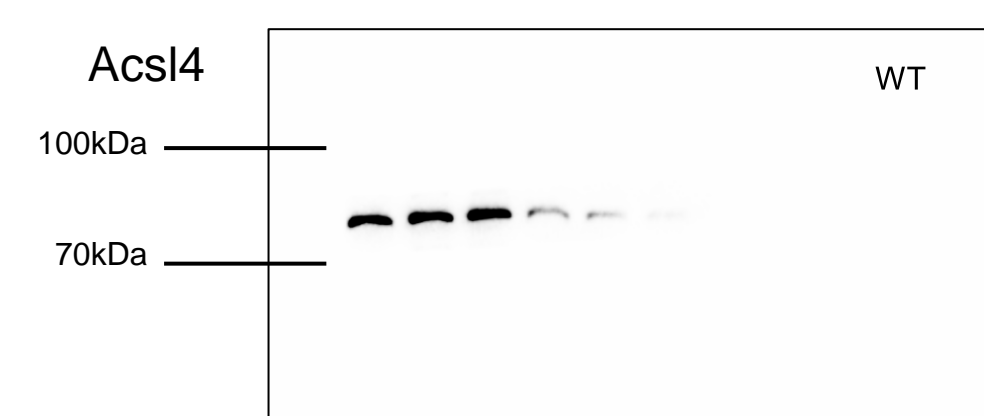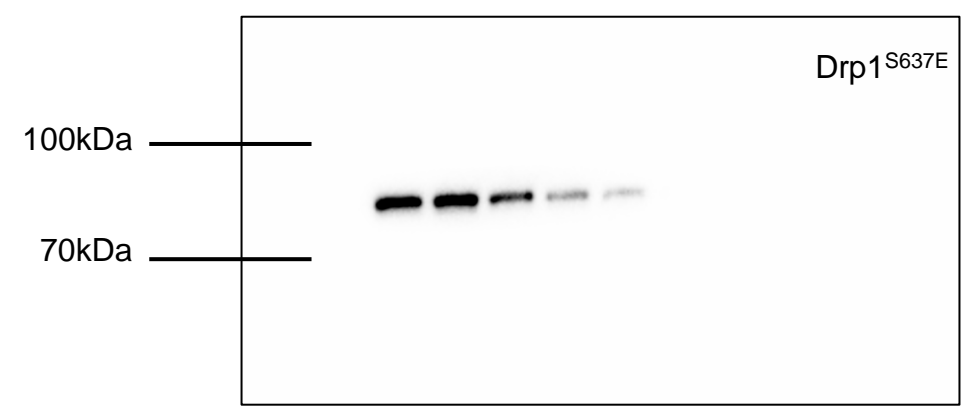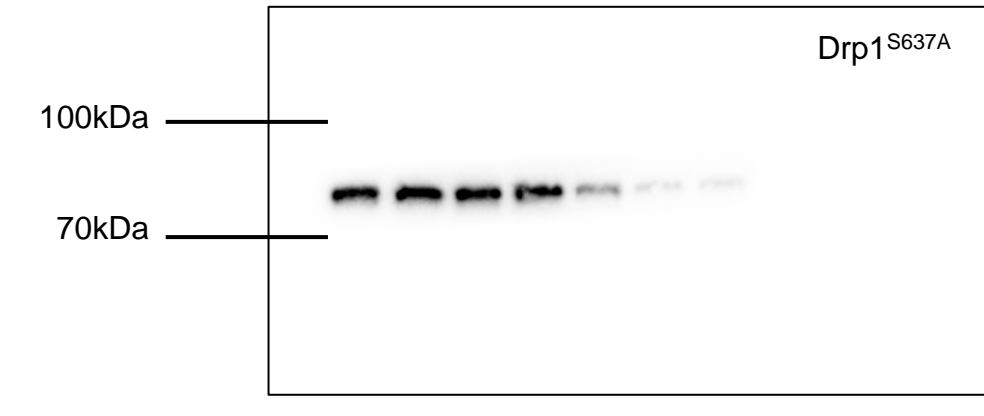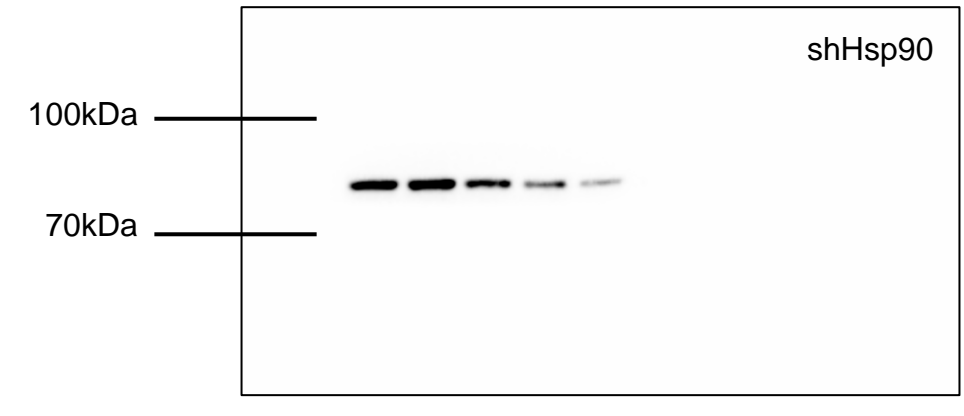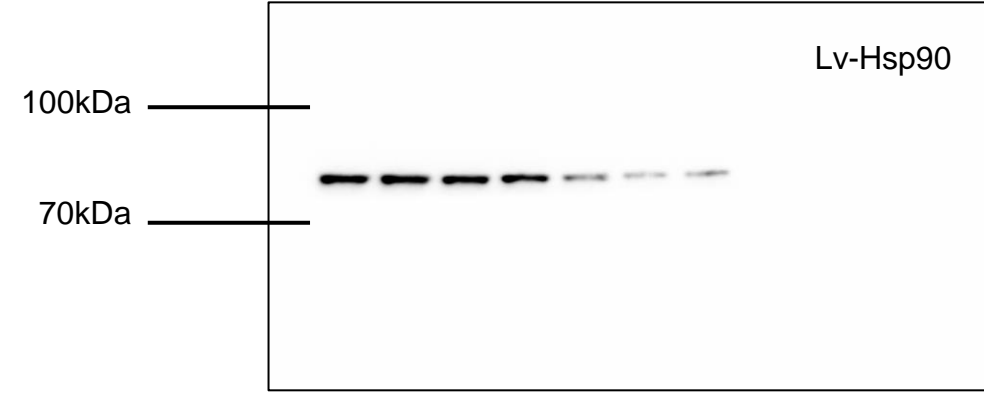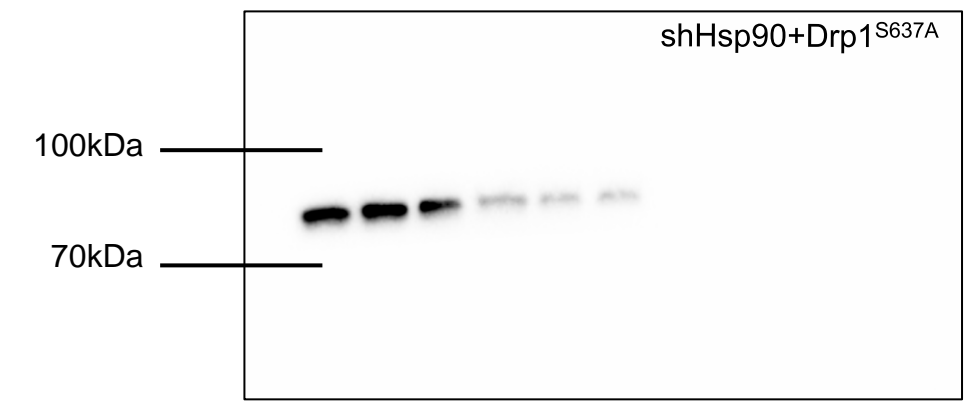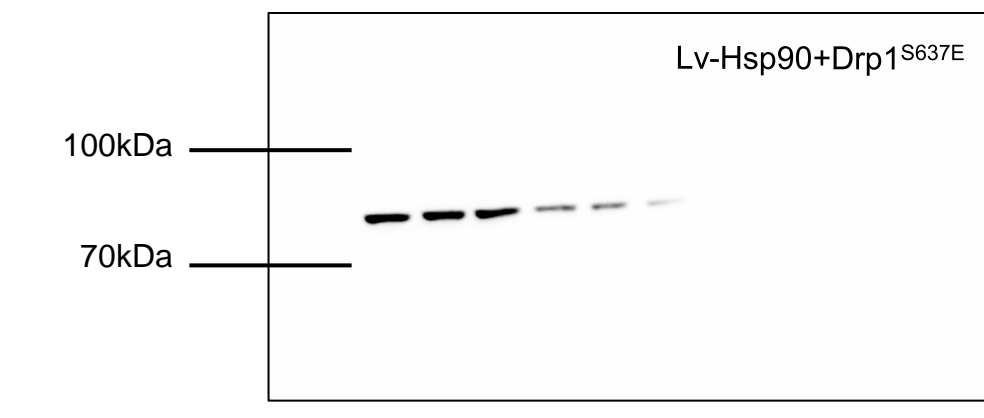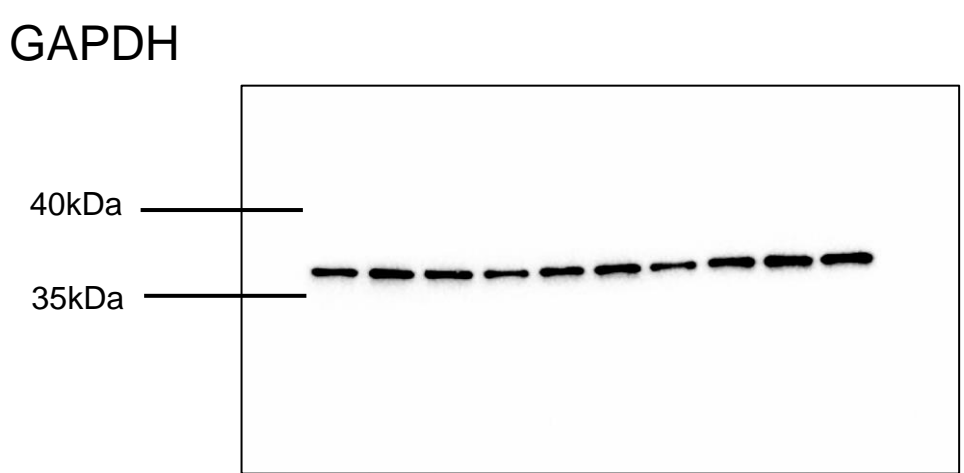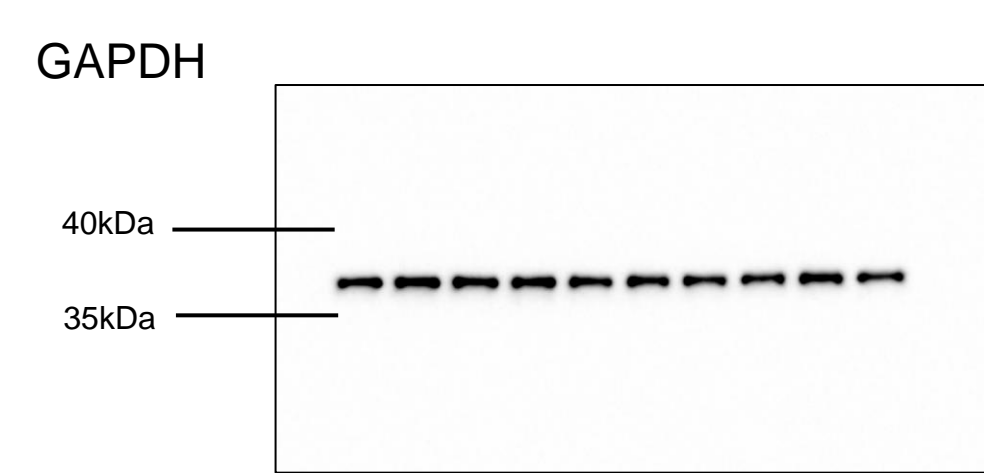

PL1

PG7

PL1

PG7

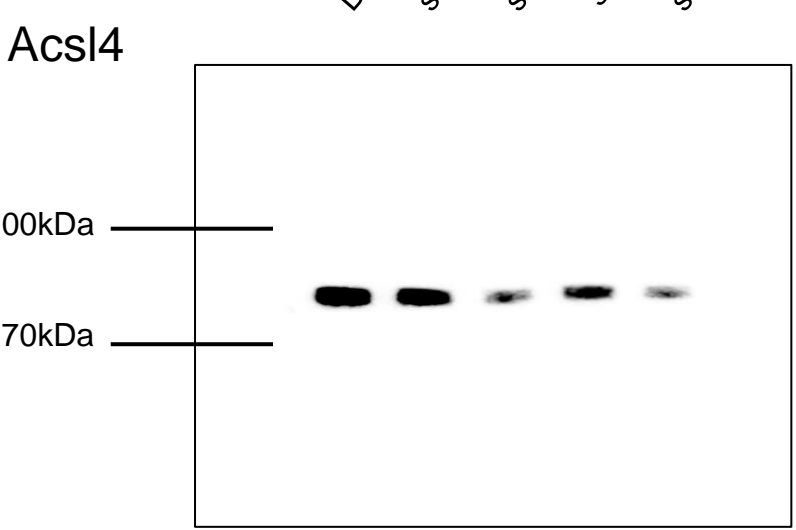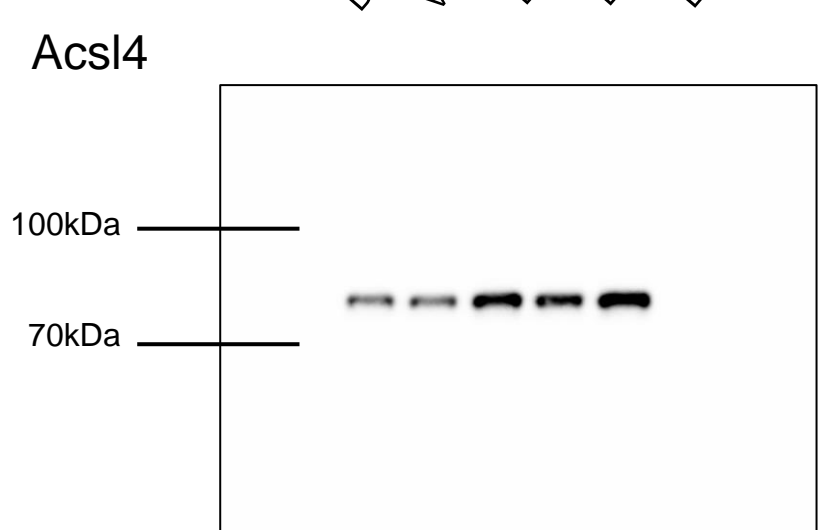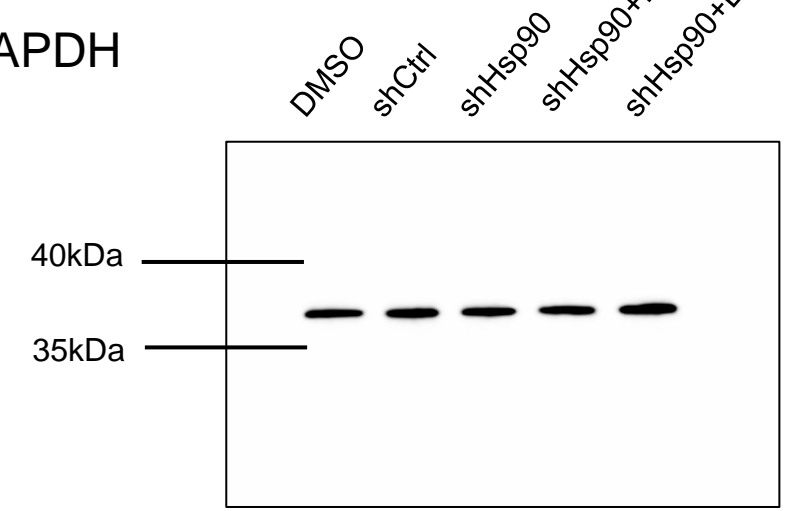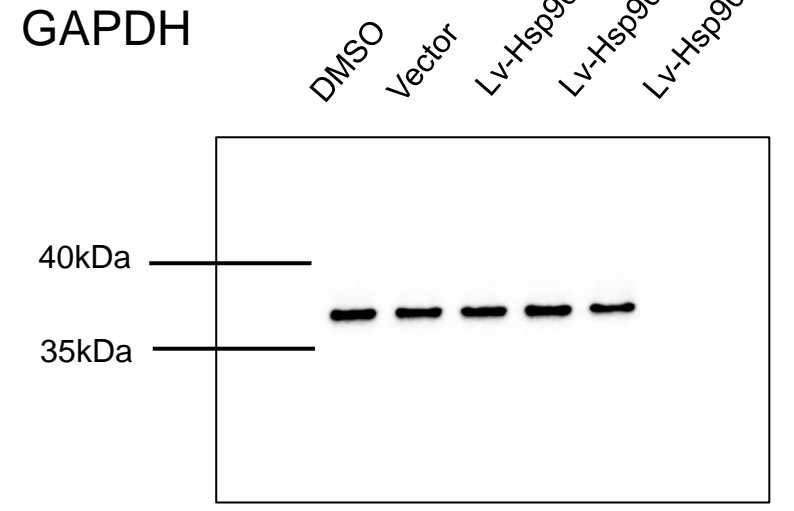

TMZ - + + + +

# rebuttal letter Q5

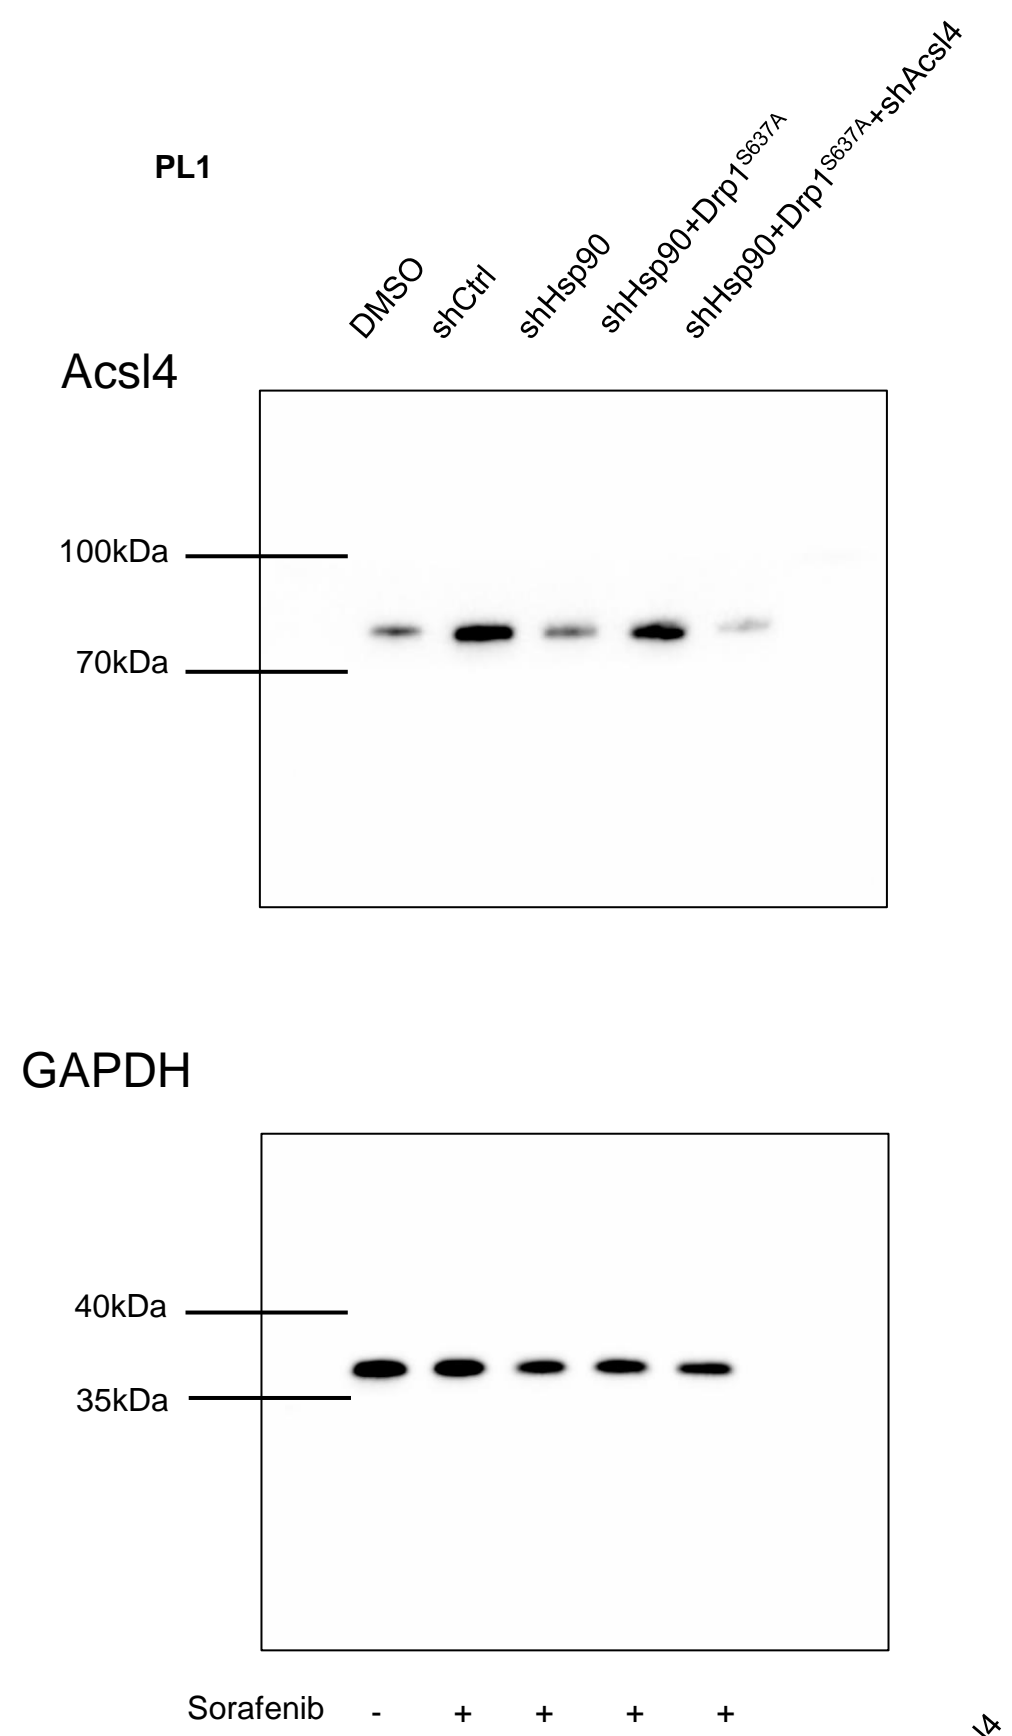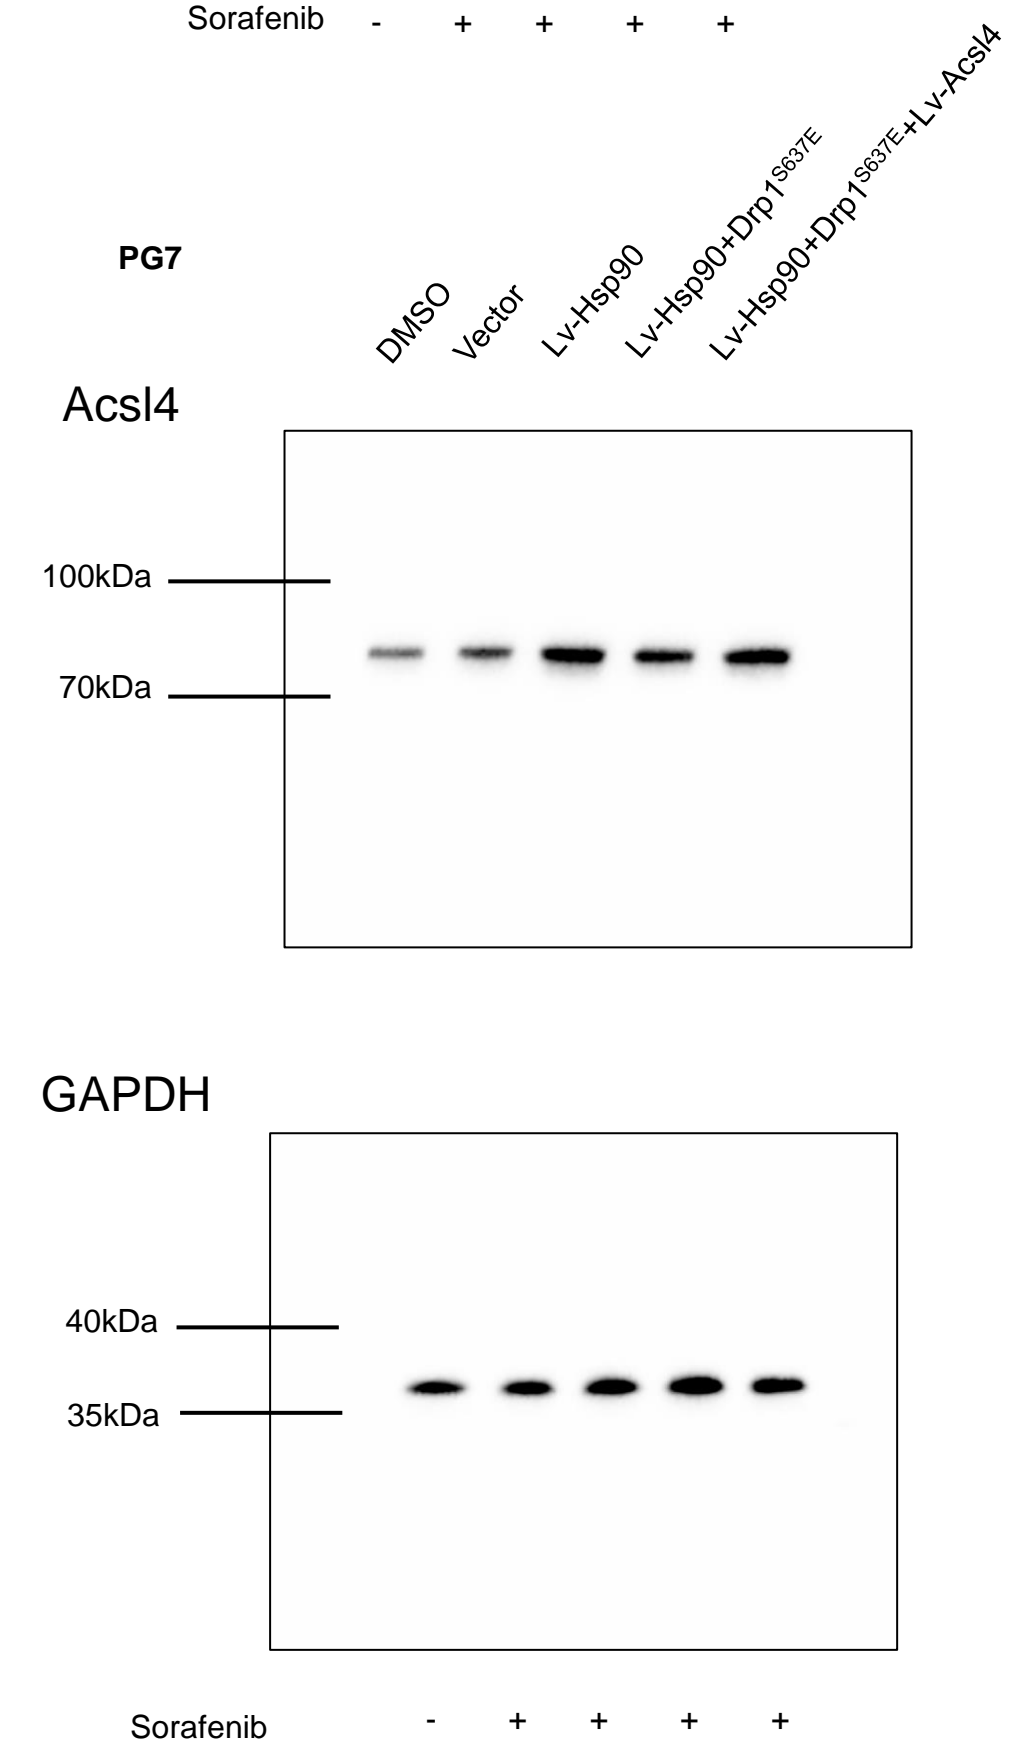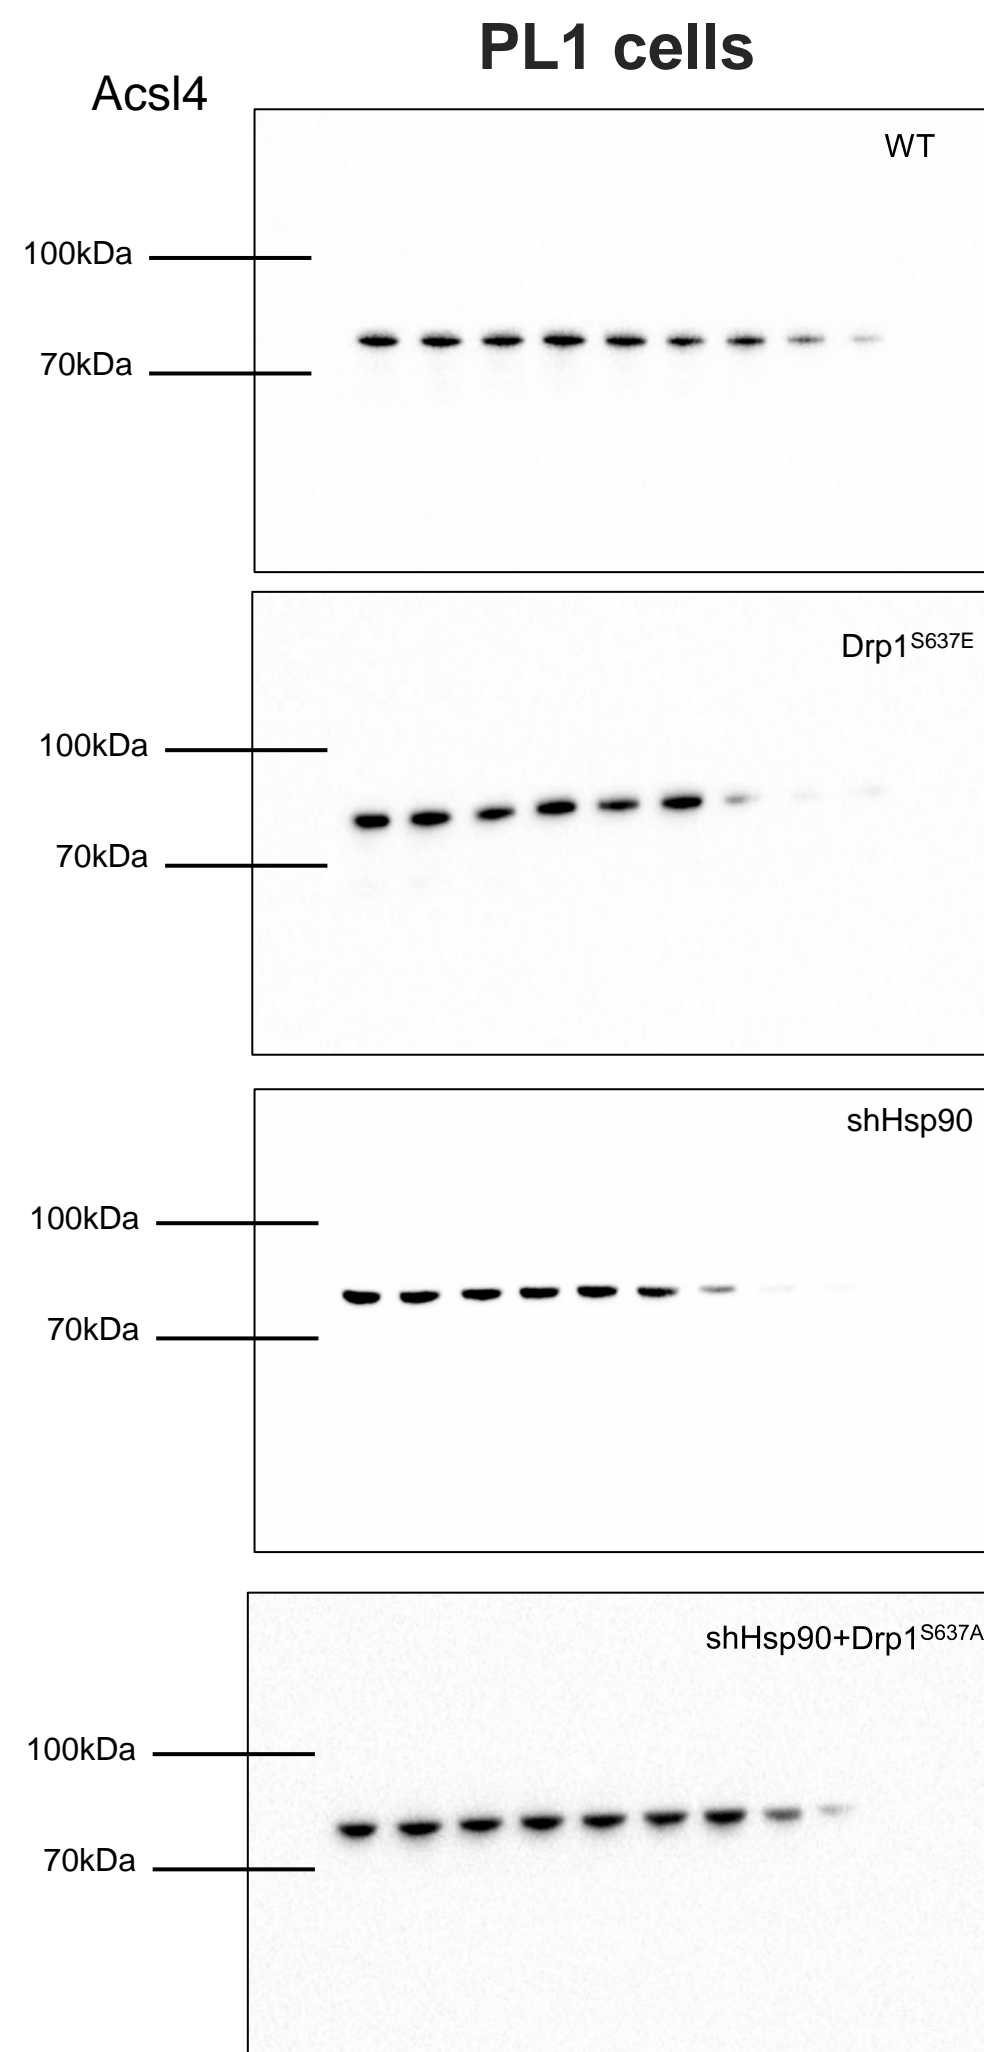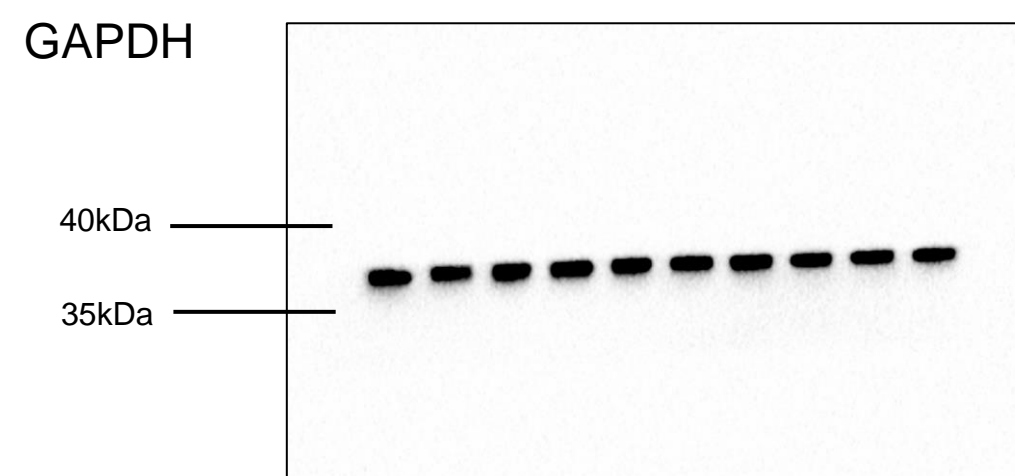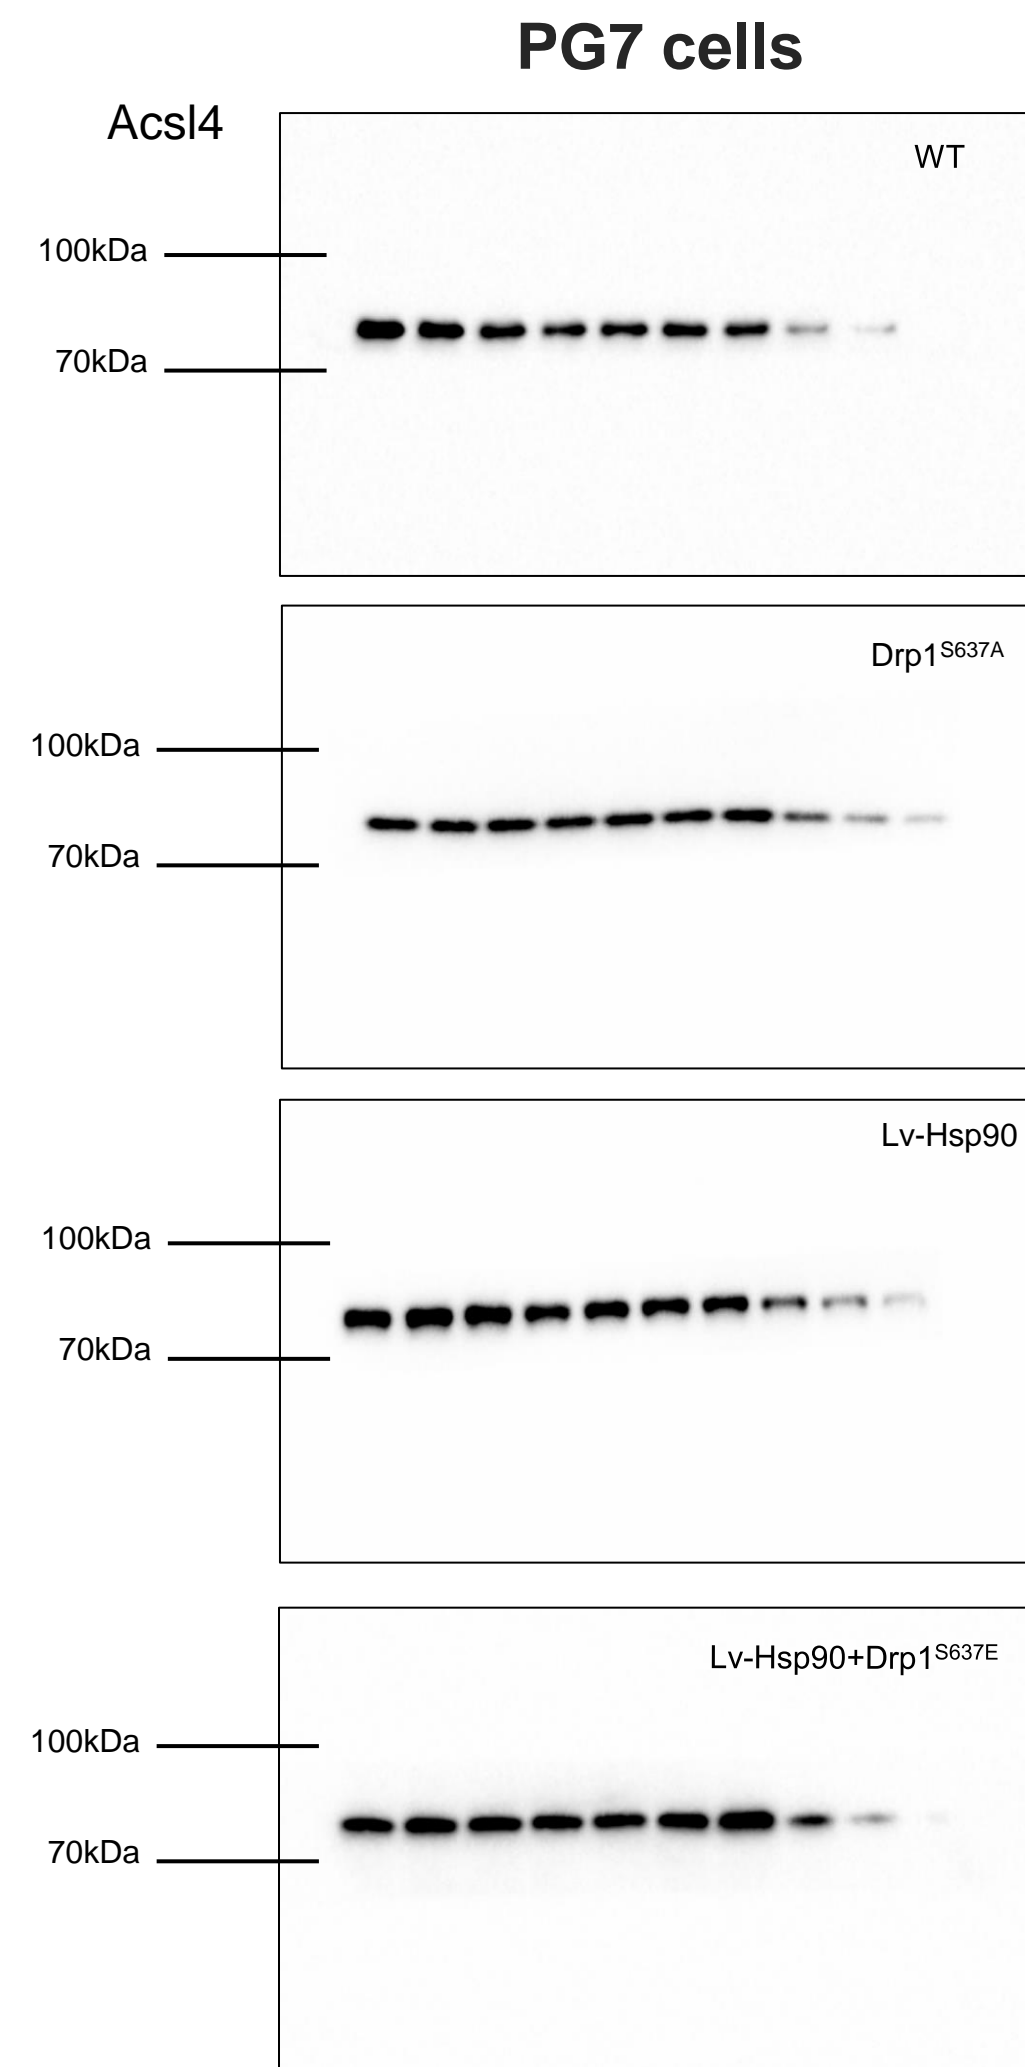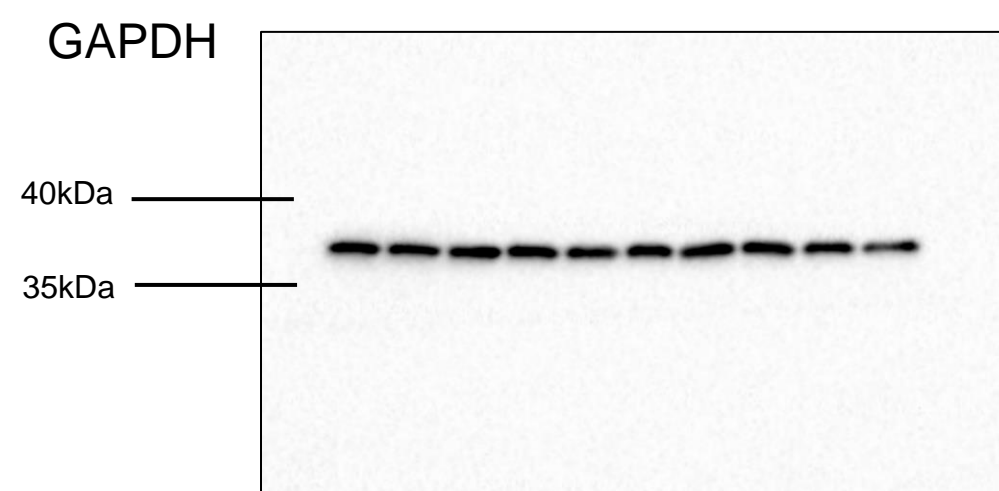

Supplement: 41419_2022_4997_MOESM2_ESM.pdf [file 41419_2022_4997_MOESM2_ESM.pdf]
